# Supplementary figures and images for: Why Do Muse Stem Cells Present an Enduring Stress Capacity? Hints from a Comparative Proteome Analysis
Source: MDPI journal article supplement (doi:10.3390/ijms22042064), 2021-02-19

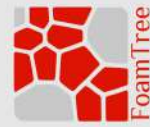



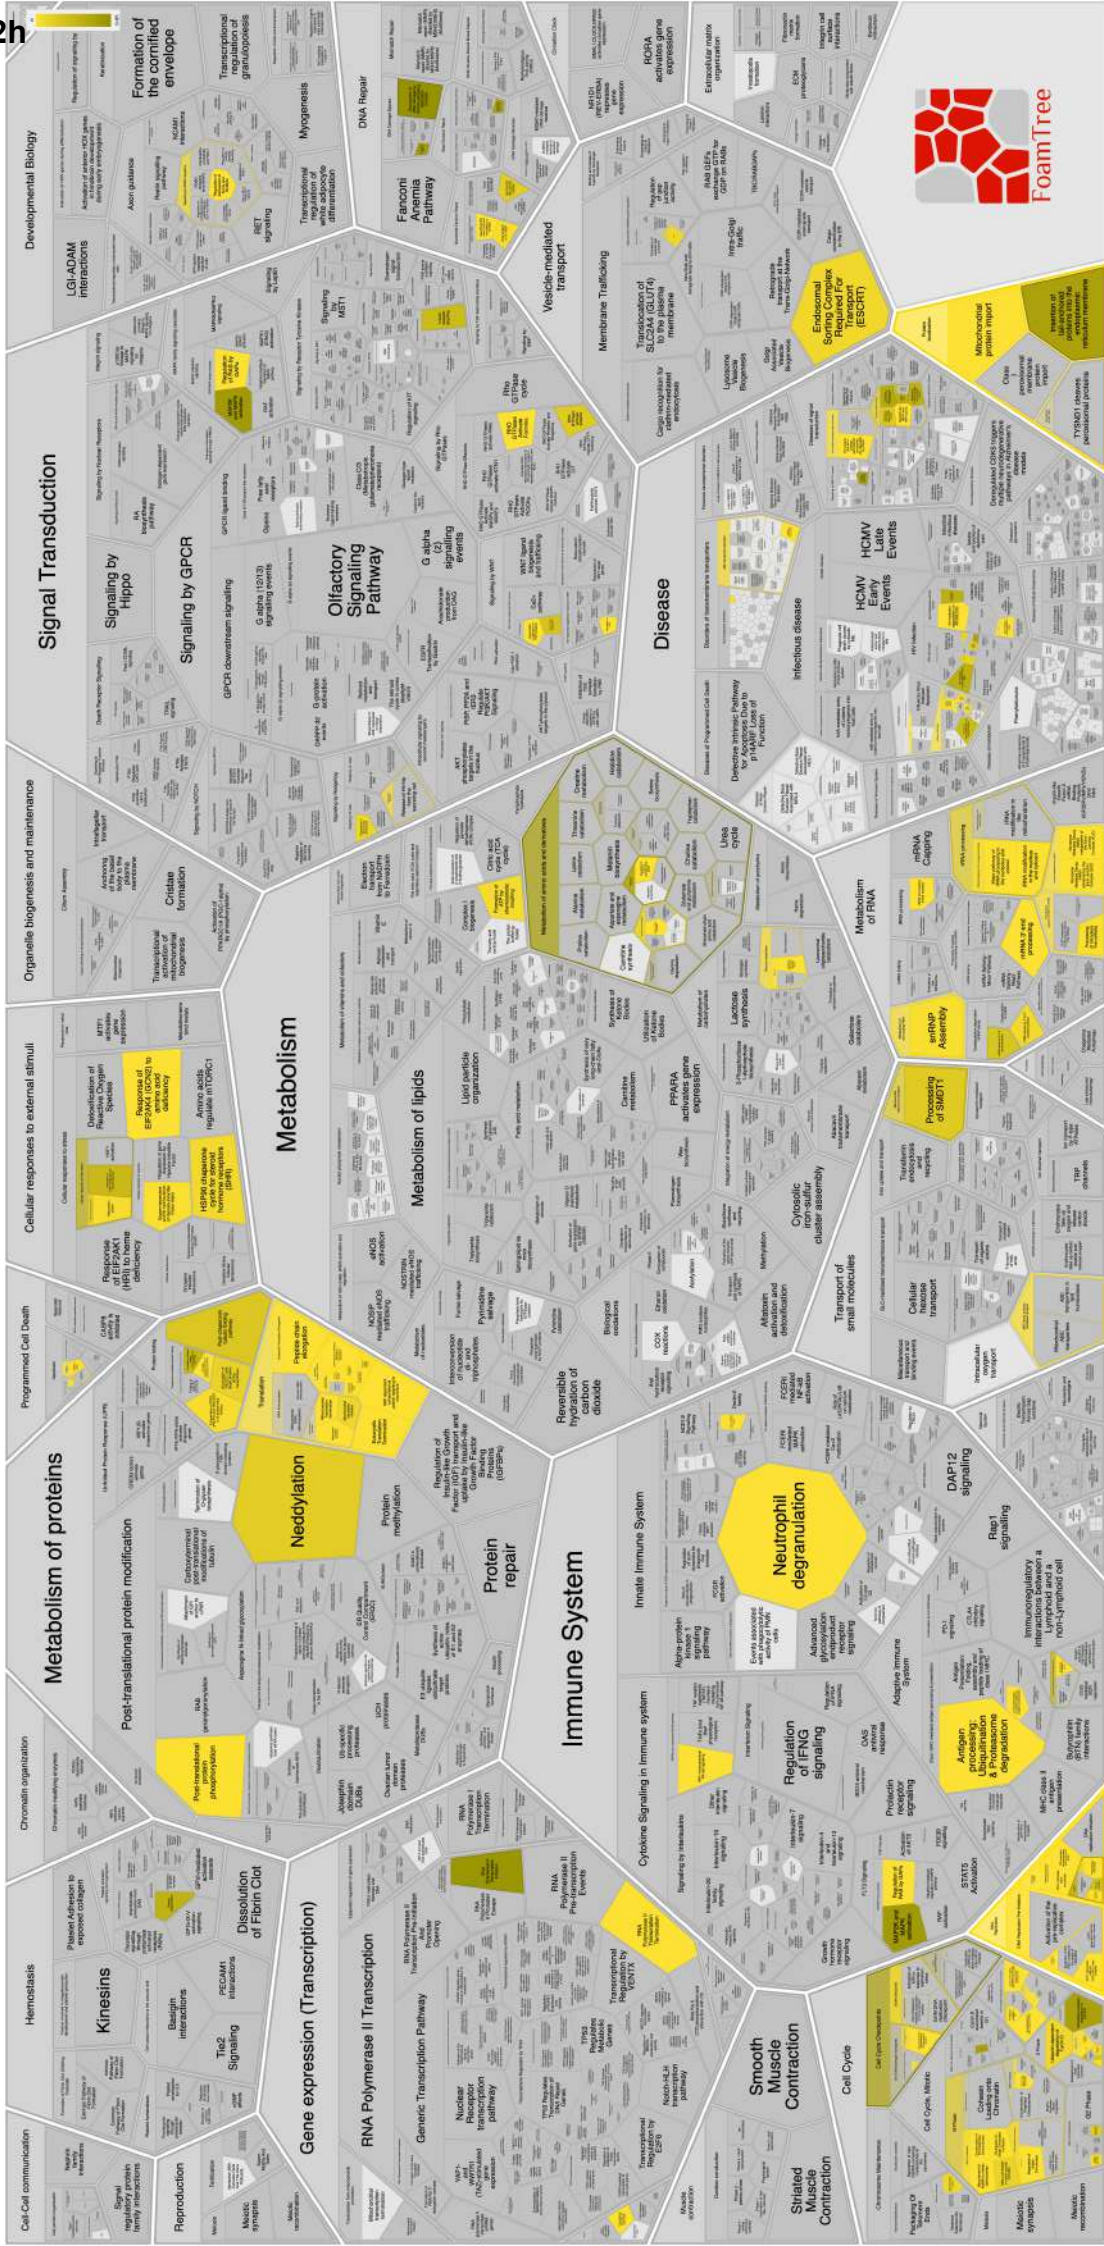







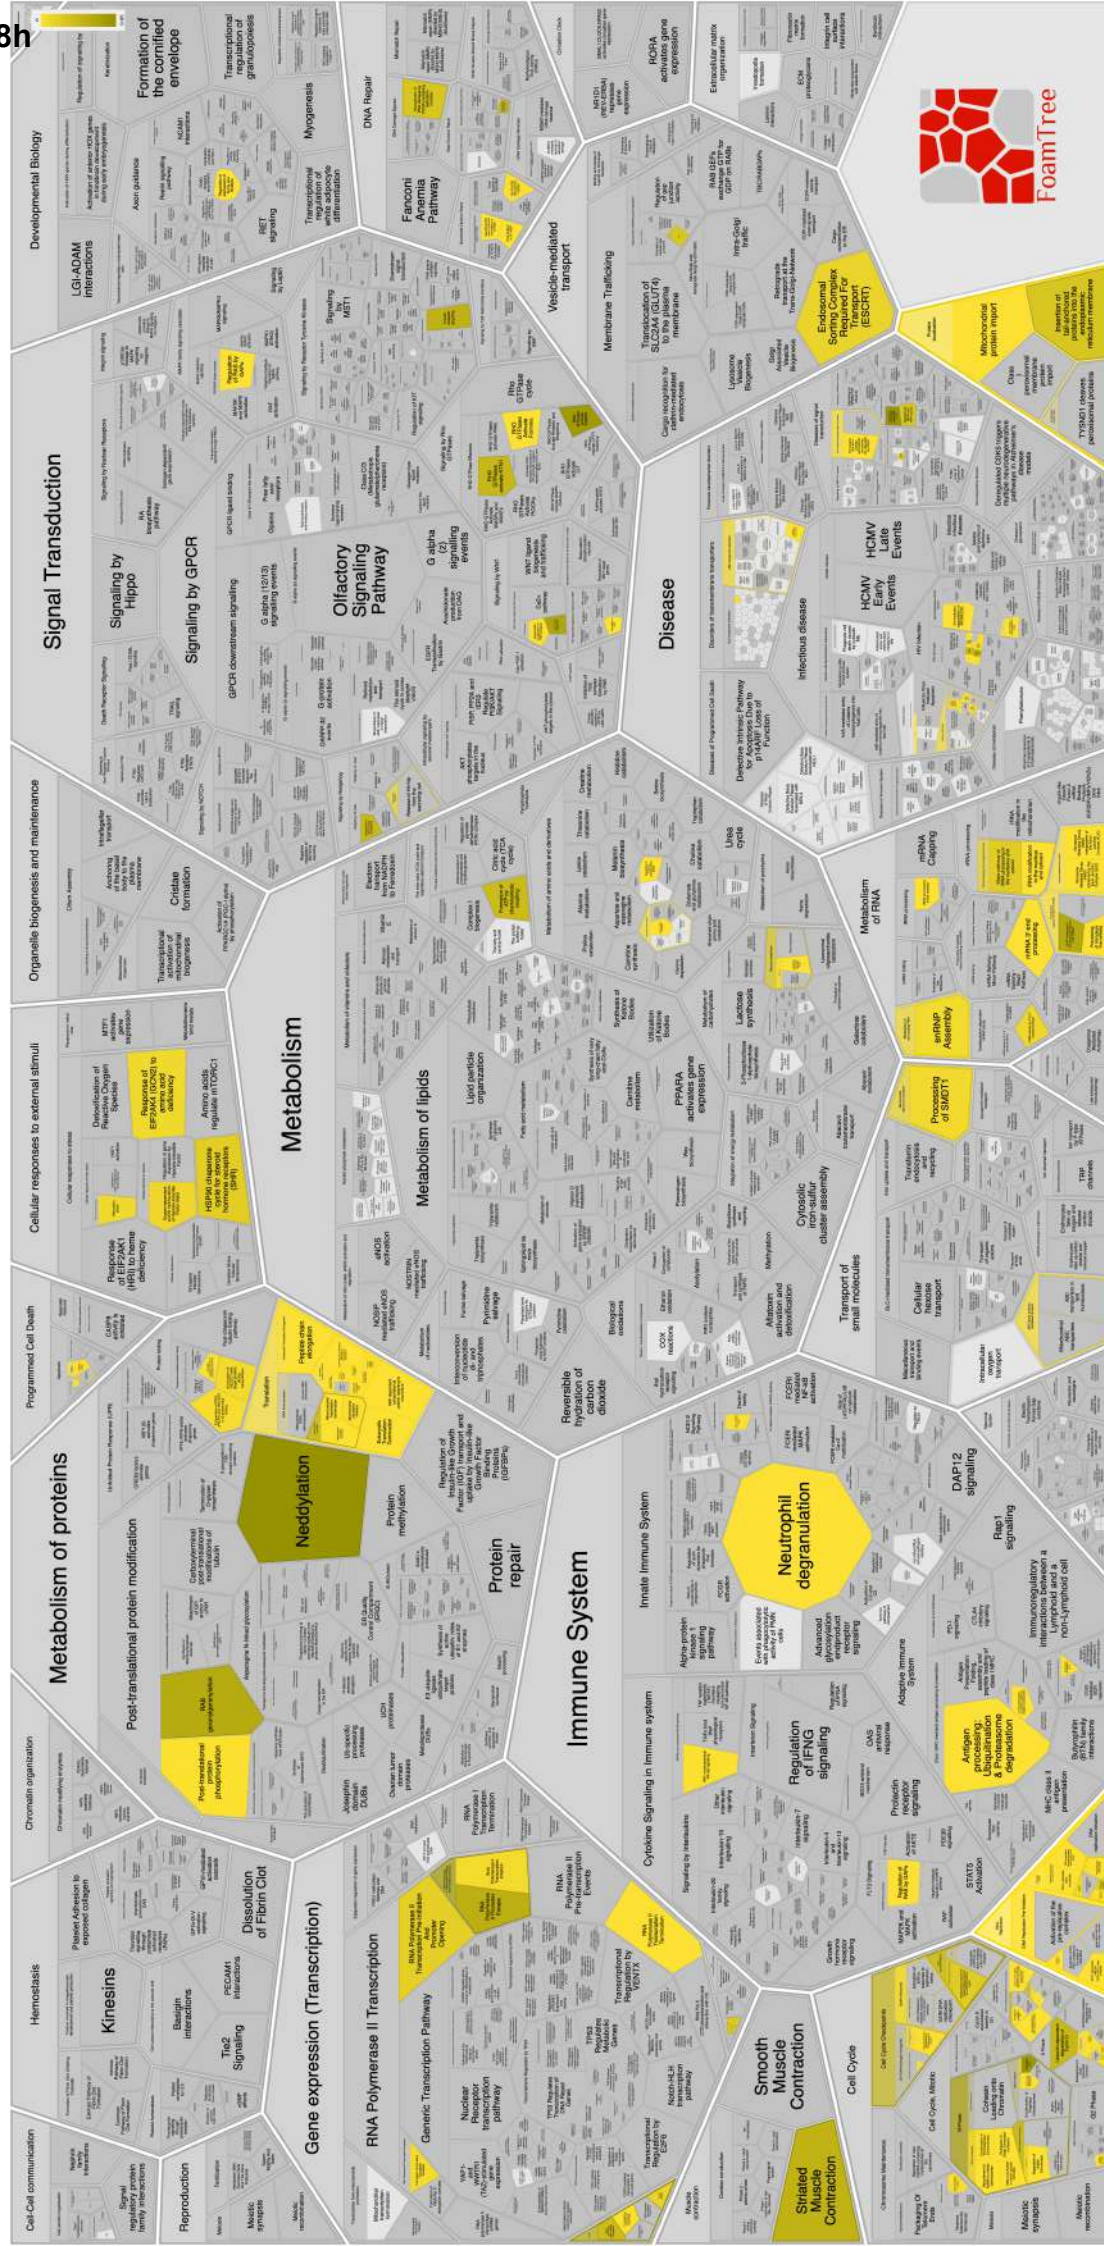



control MSCs

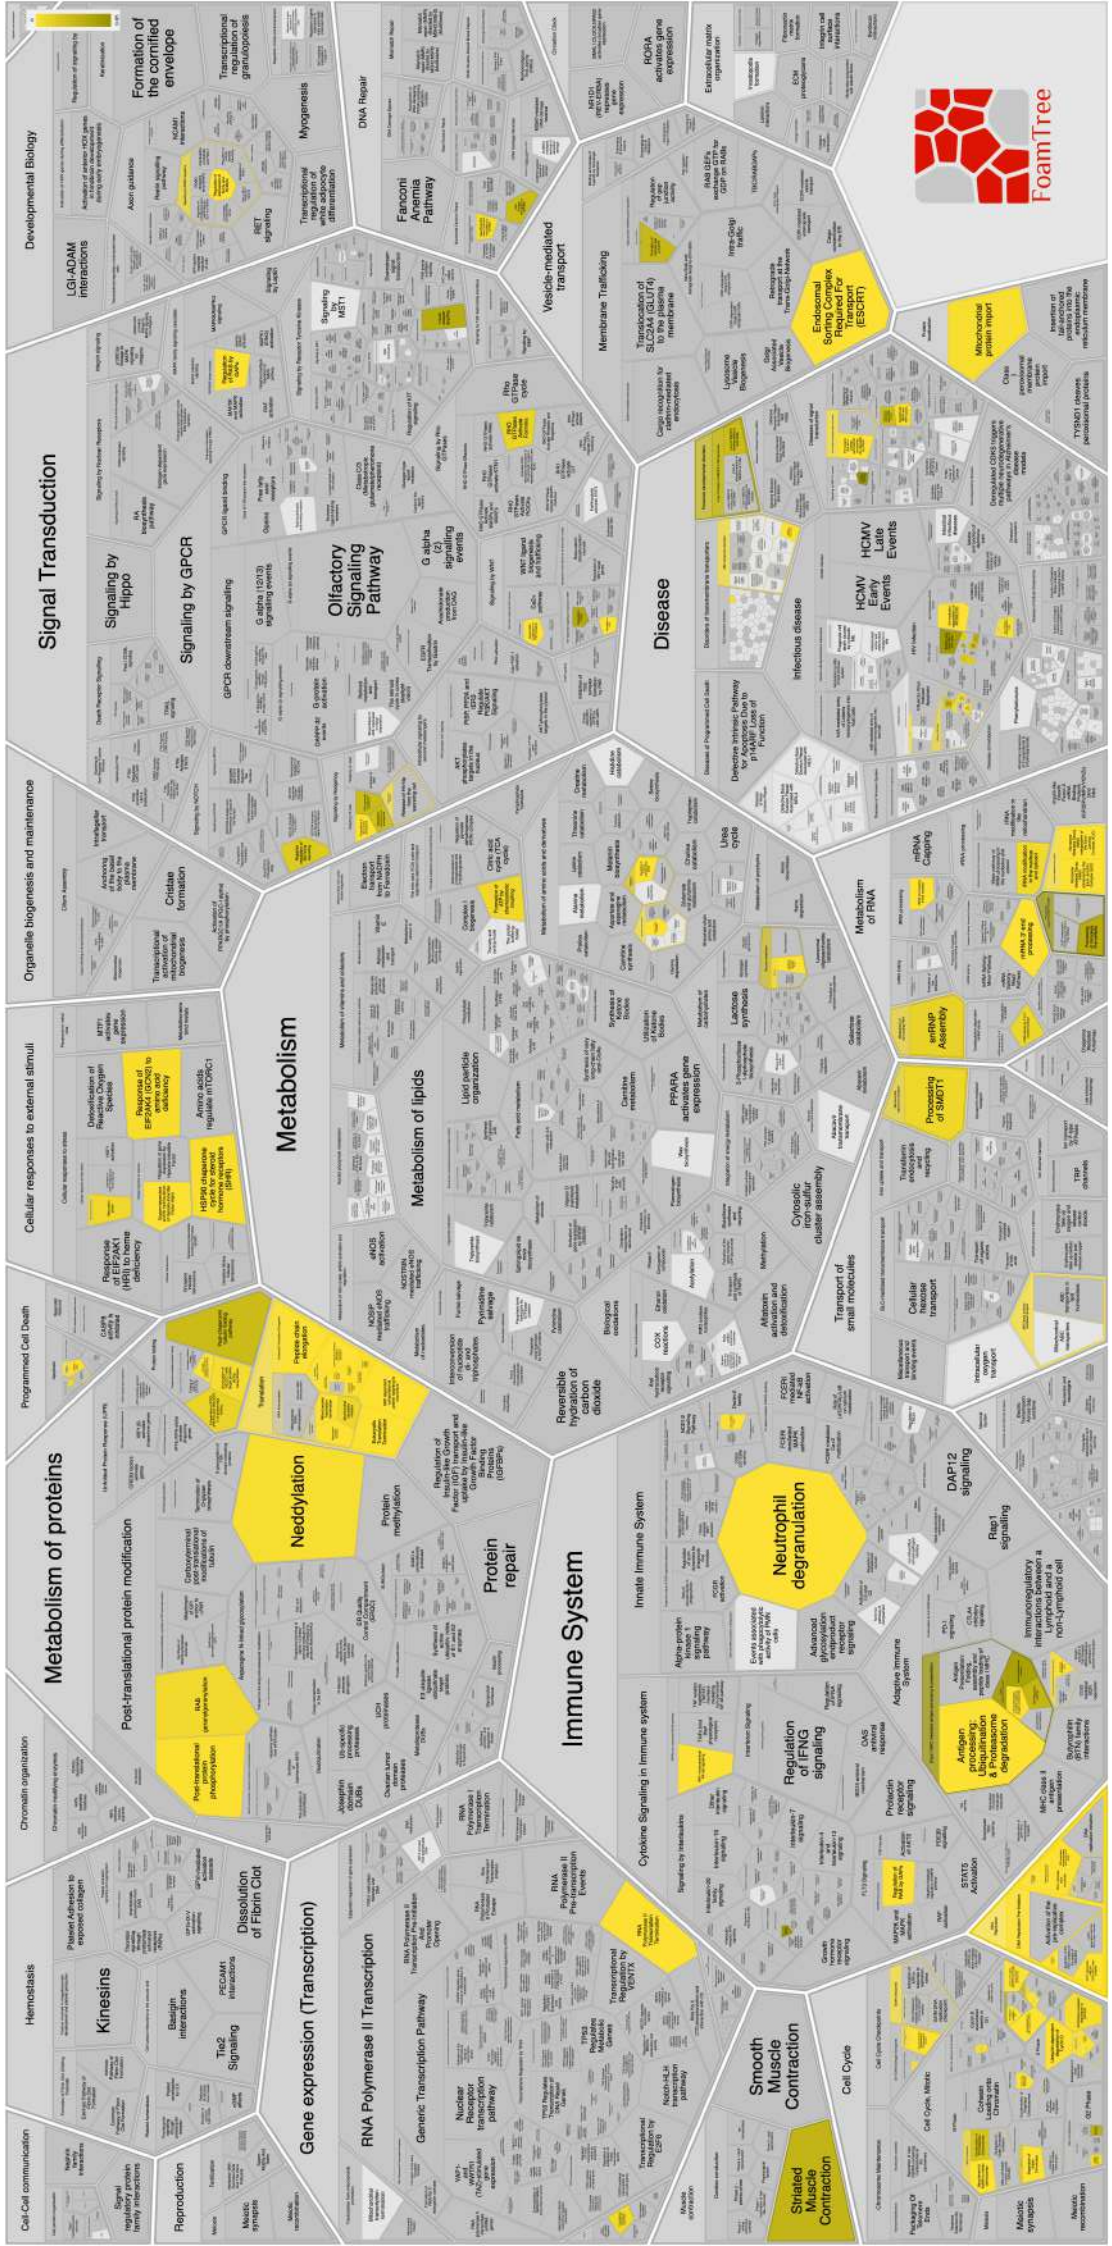



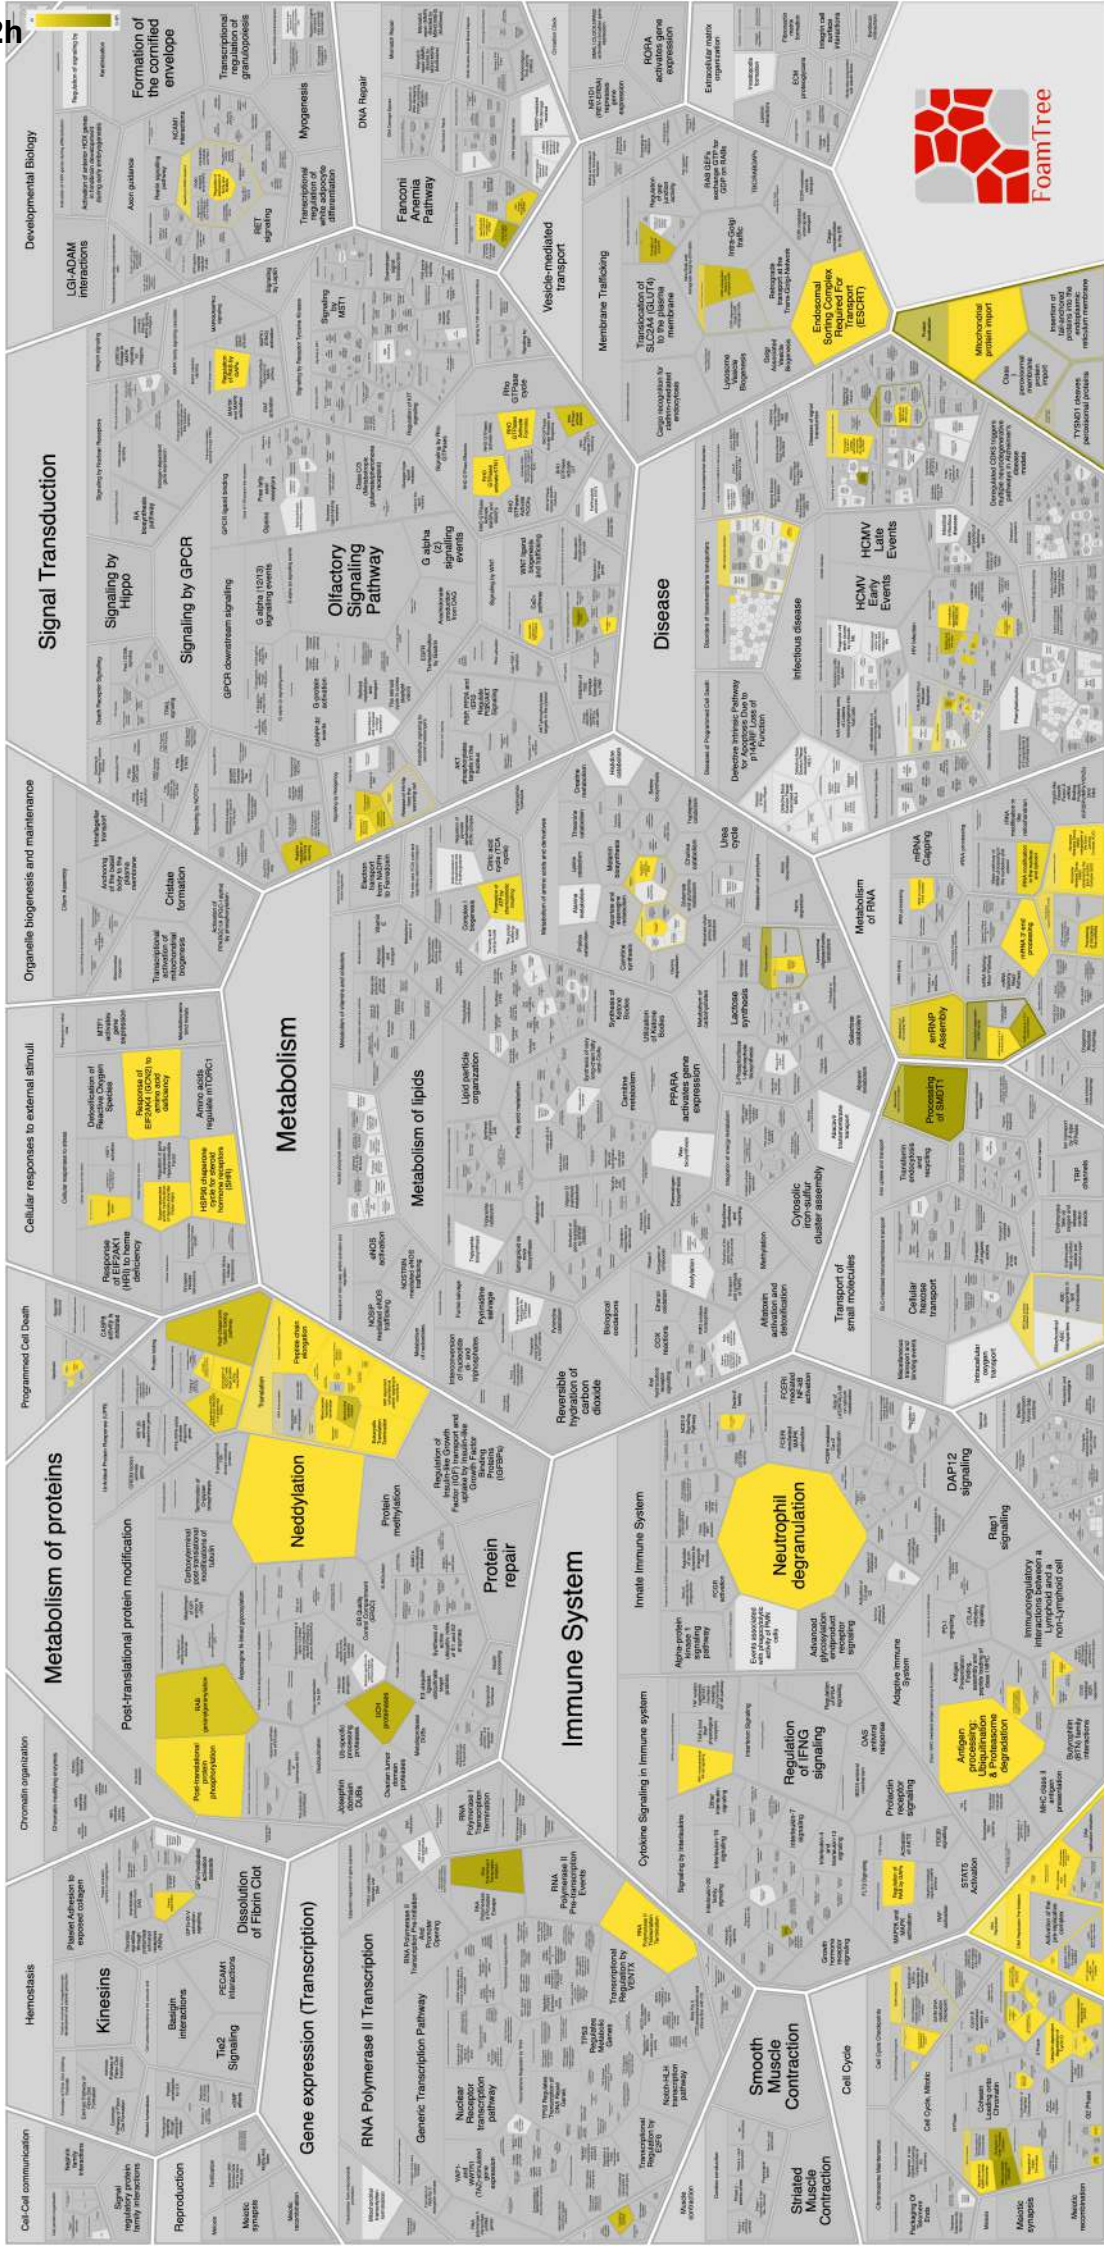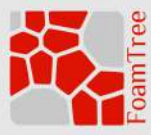



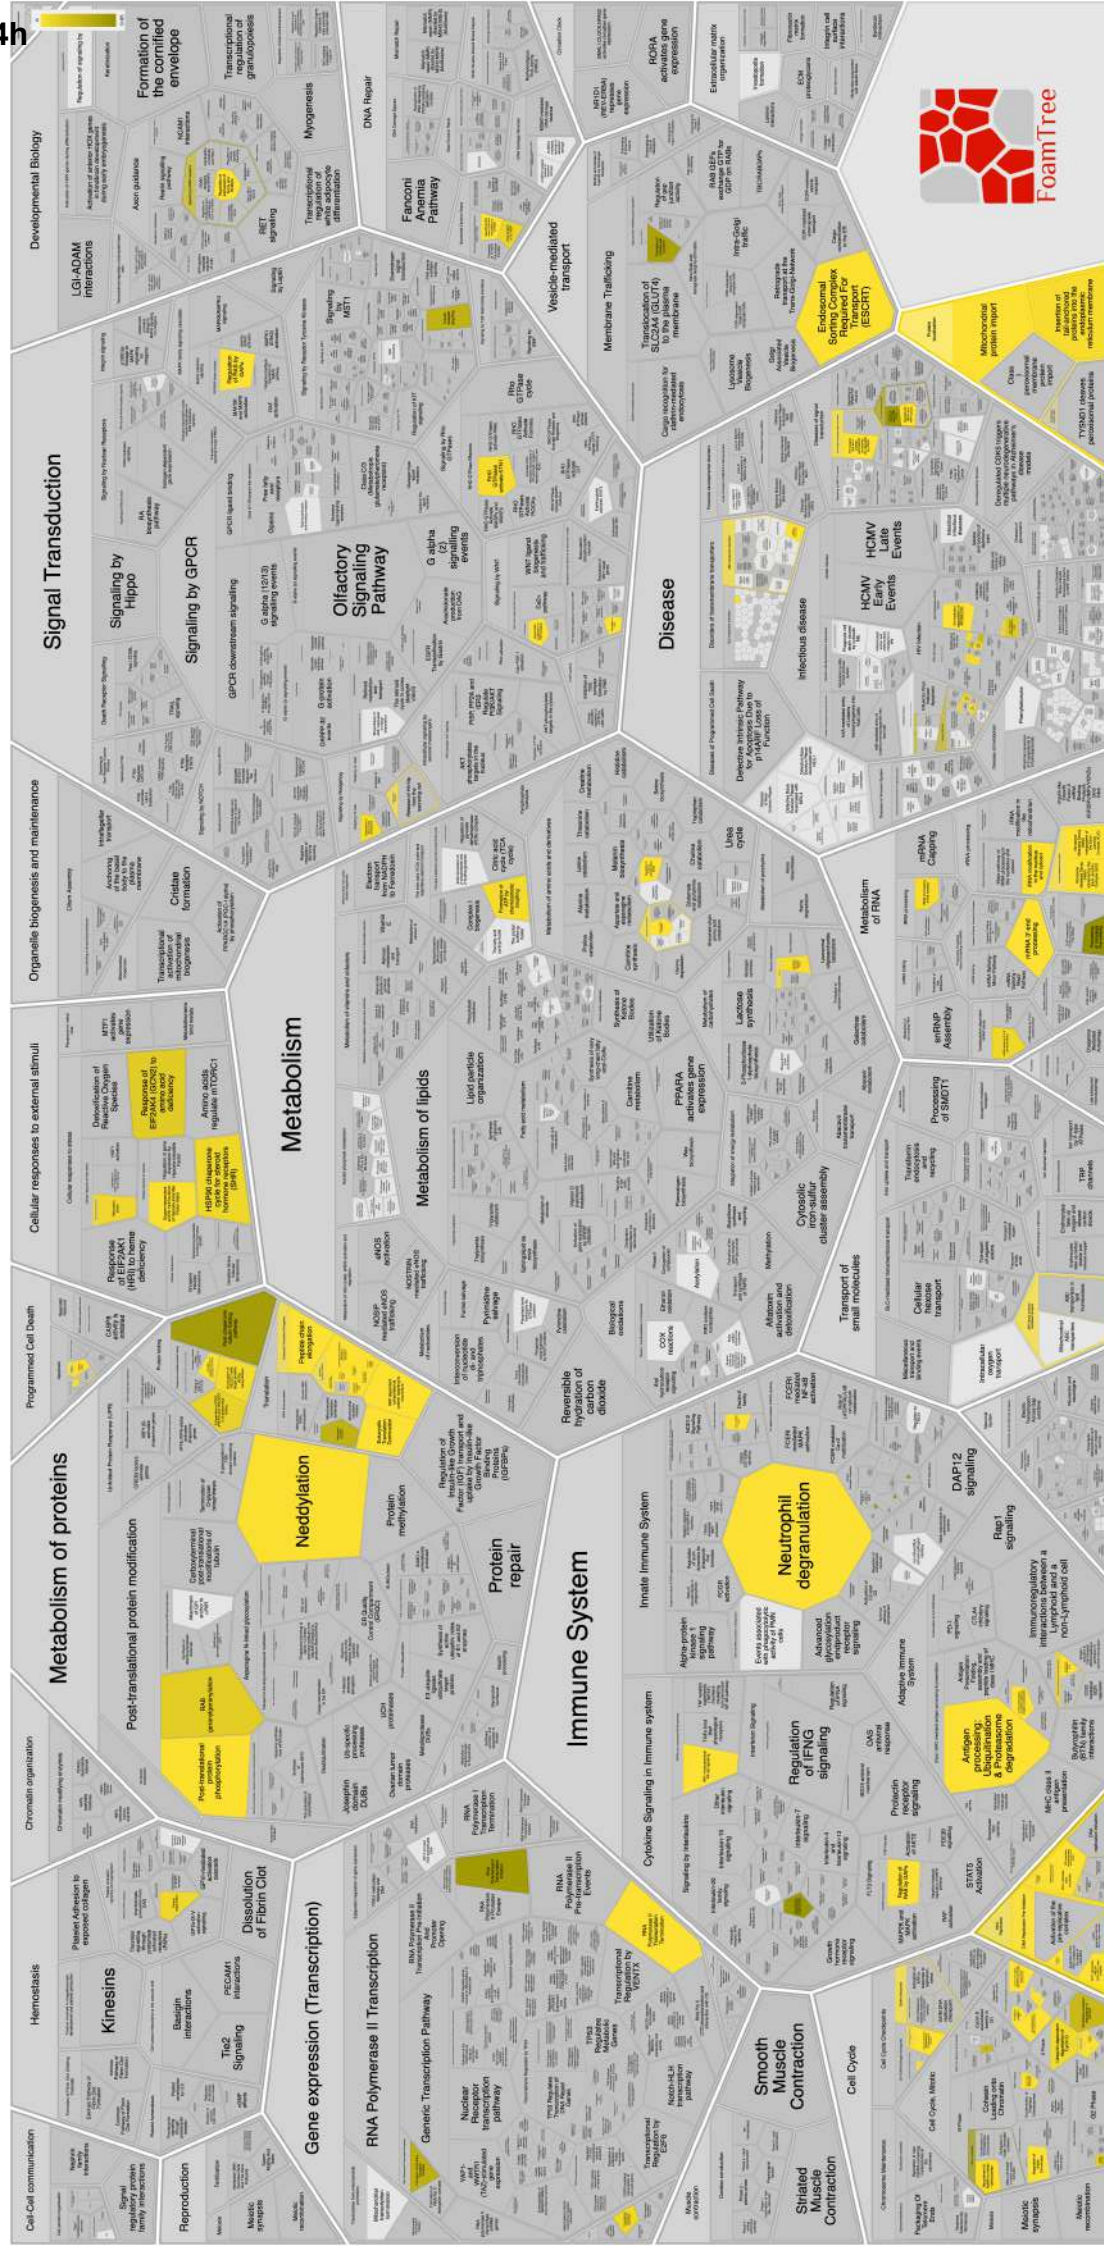



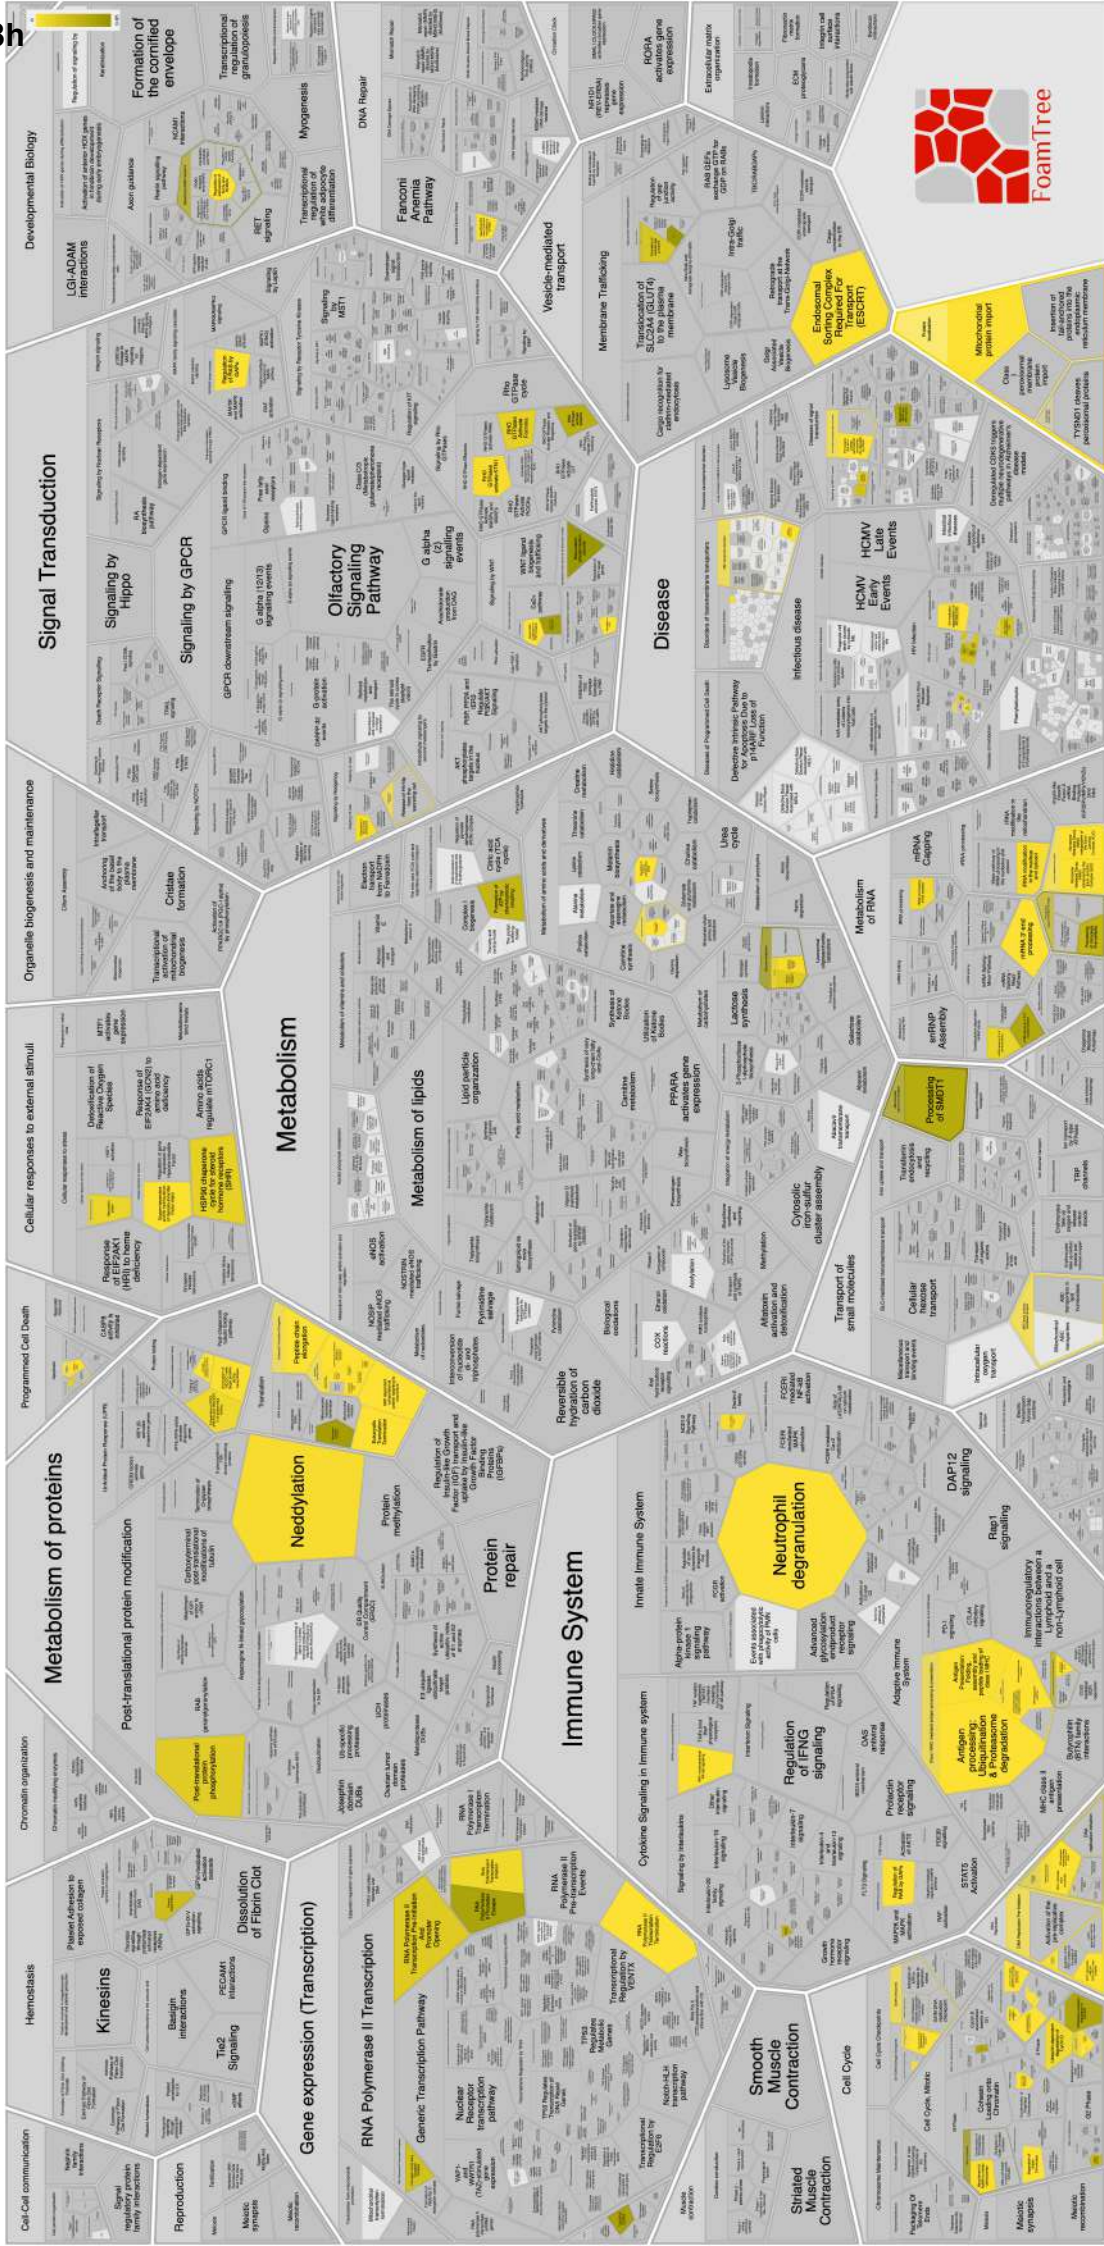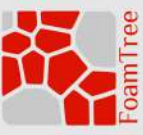



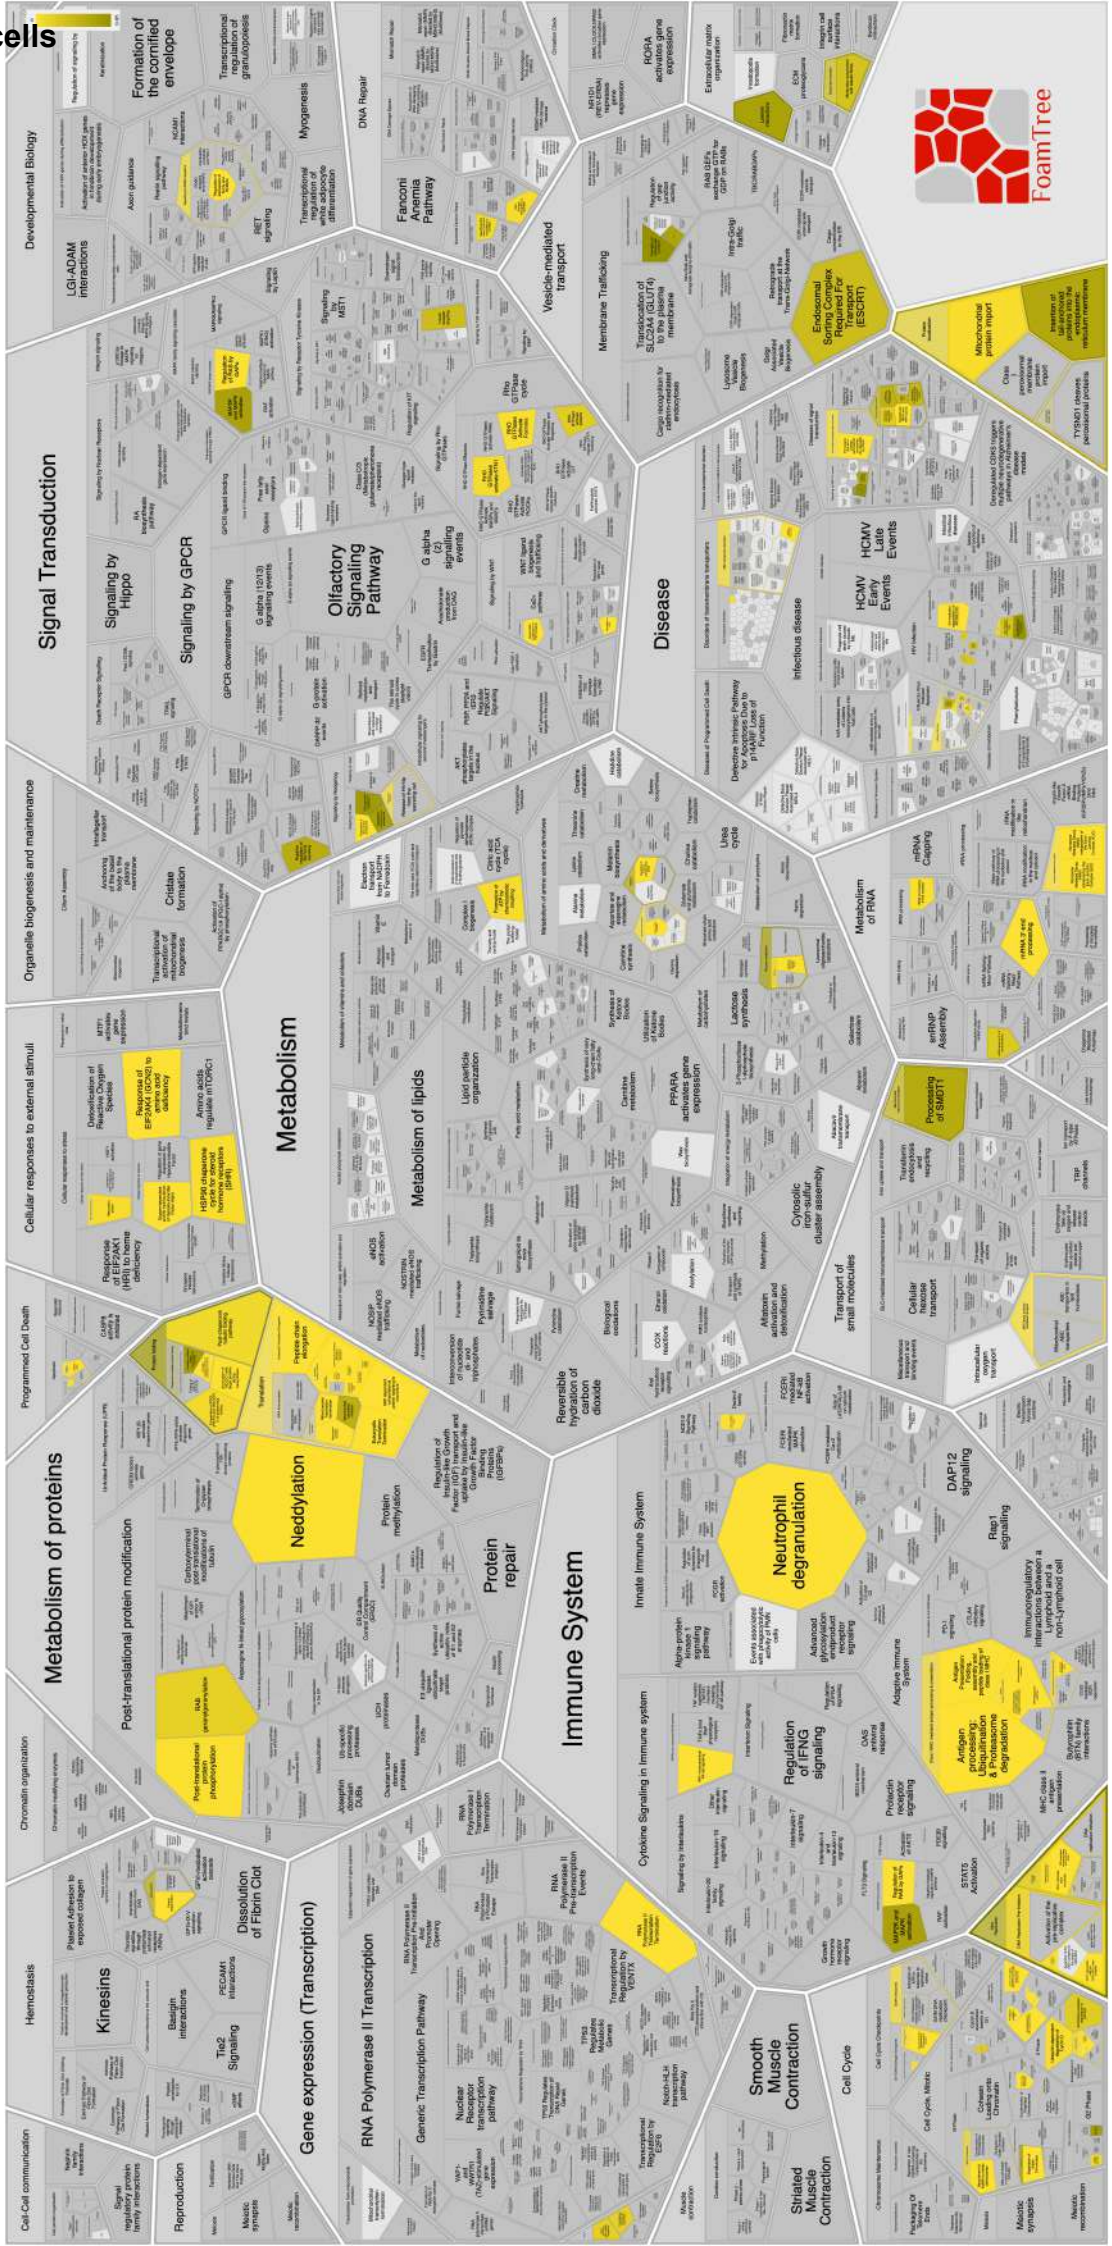



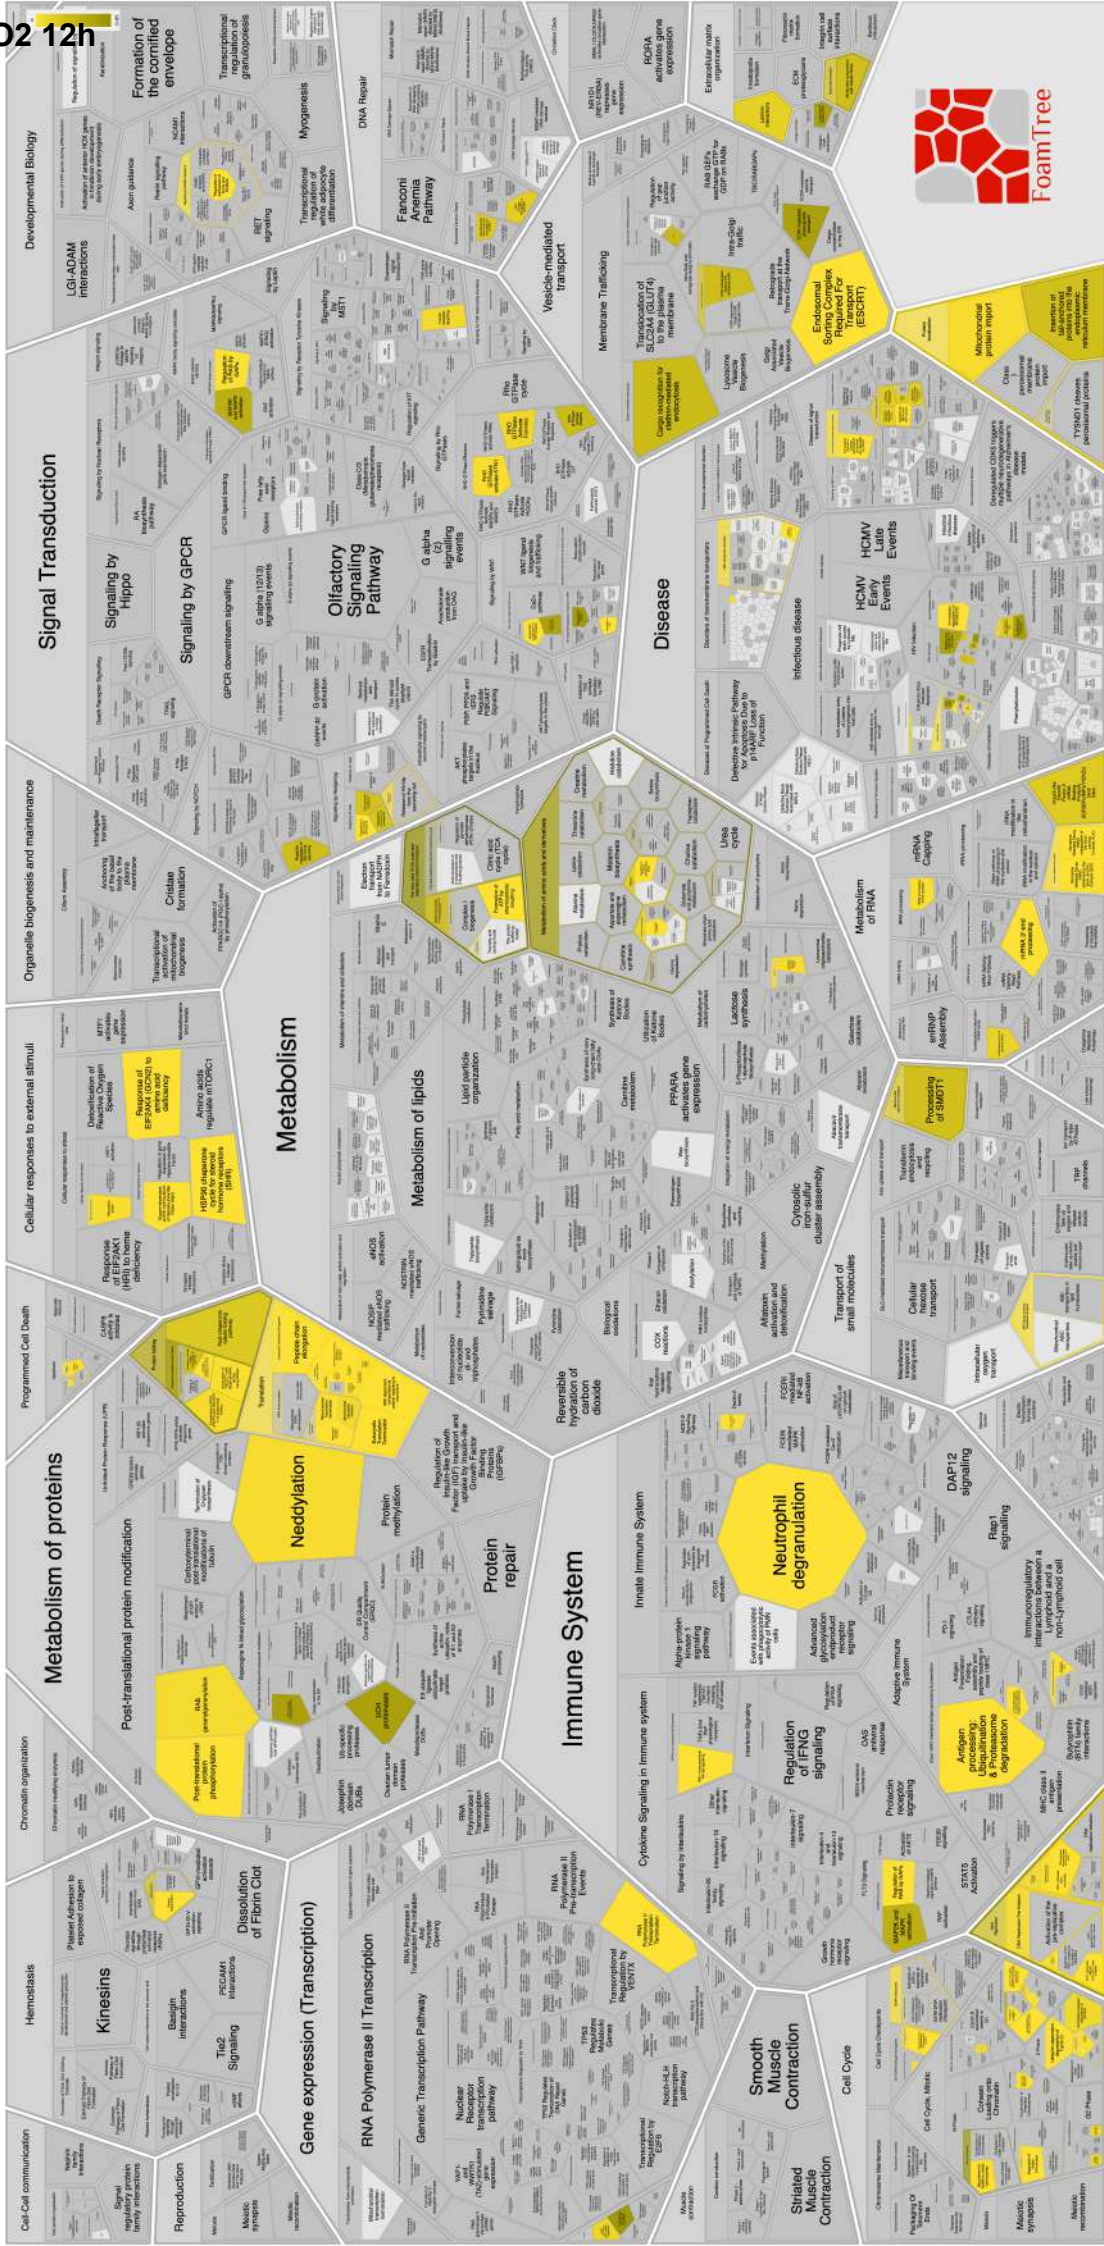



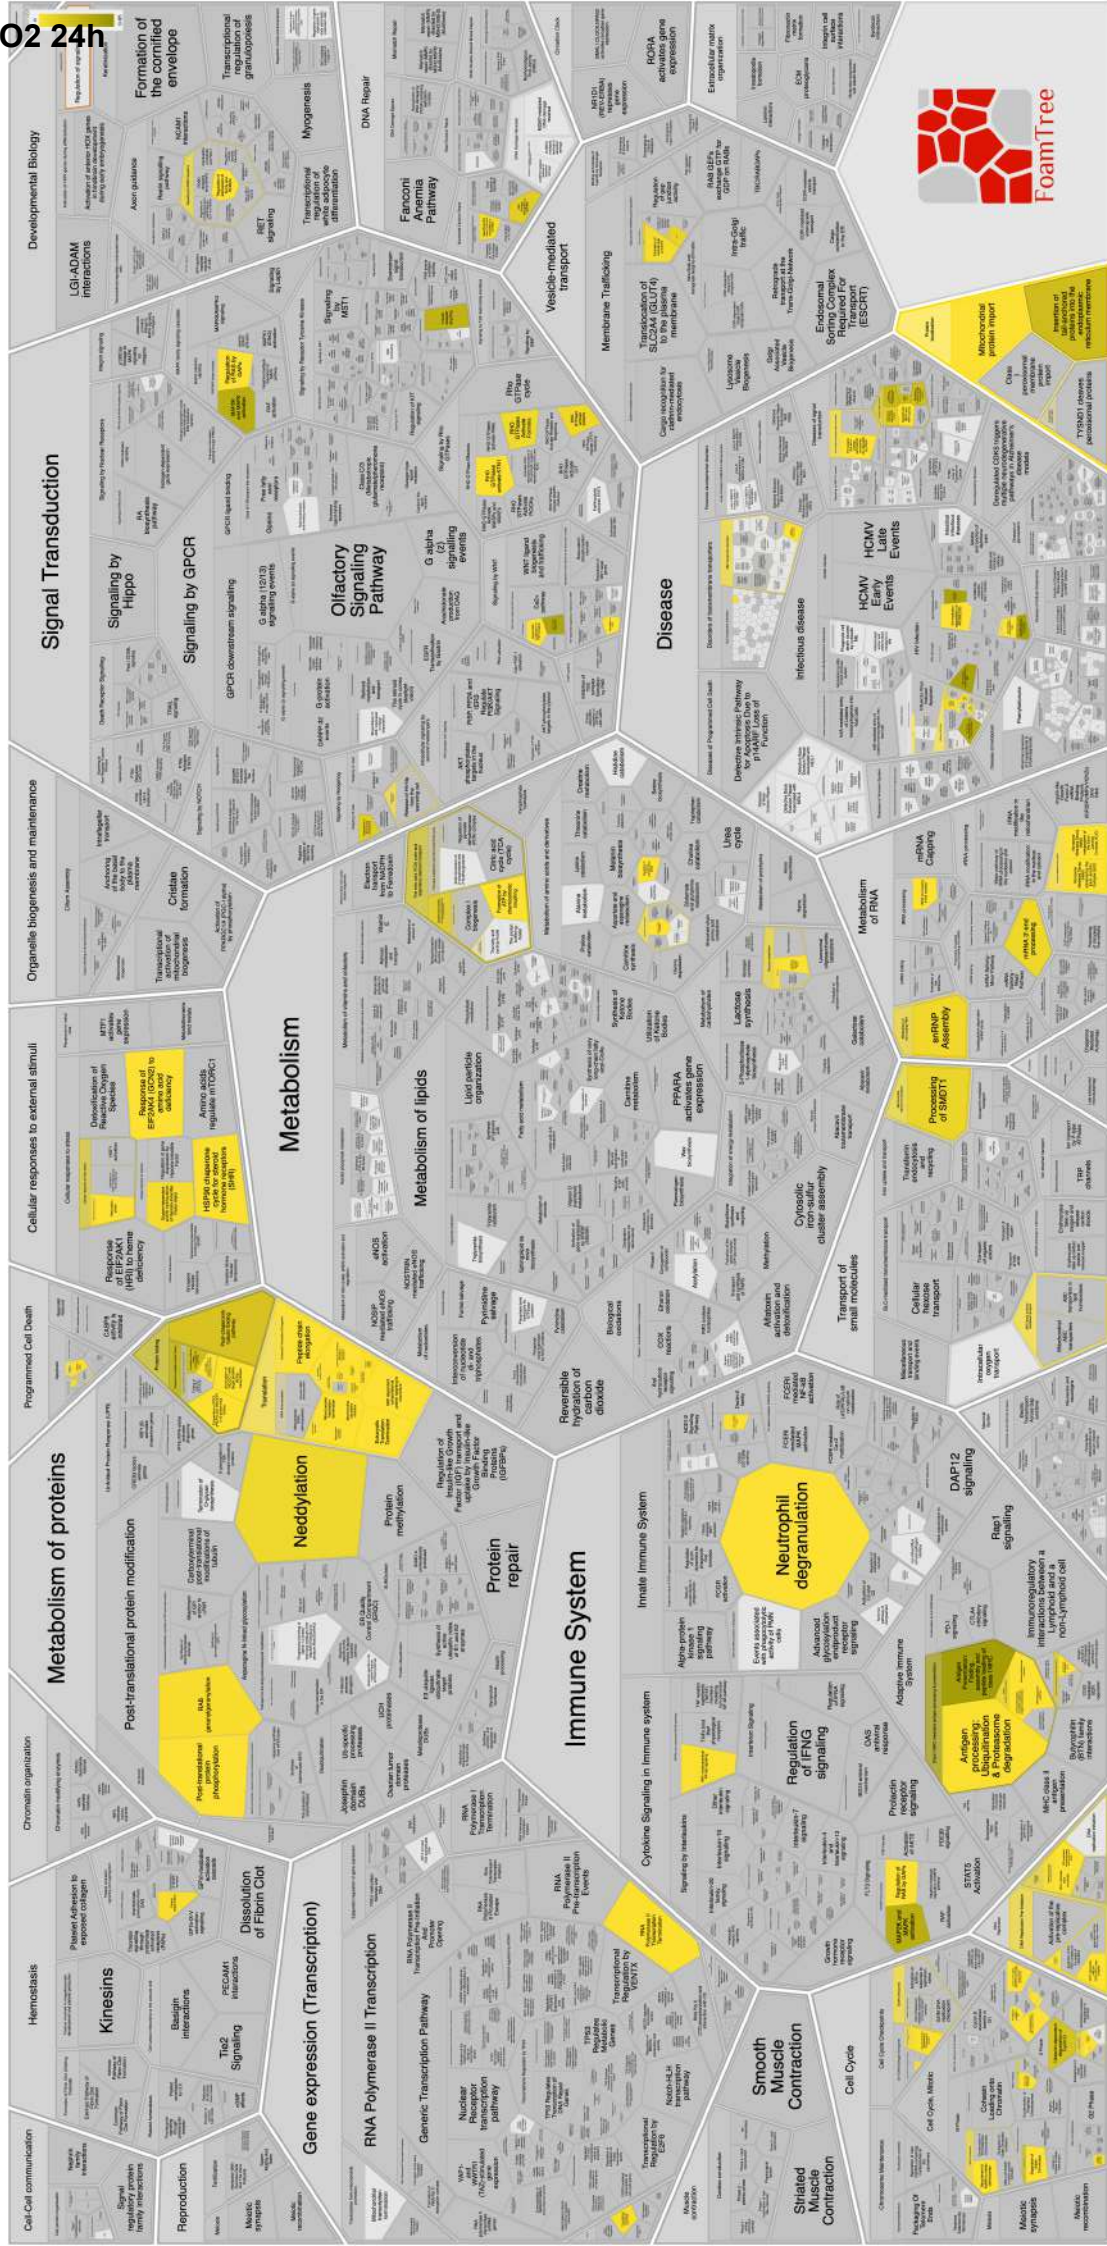



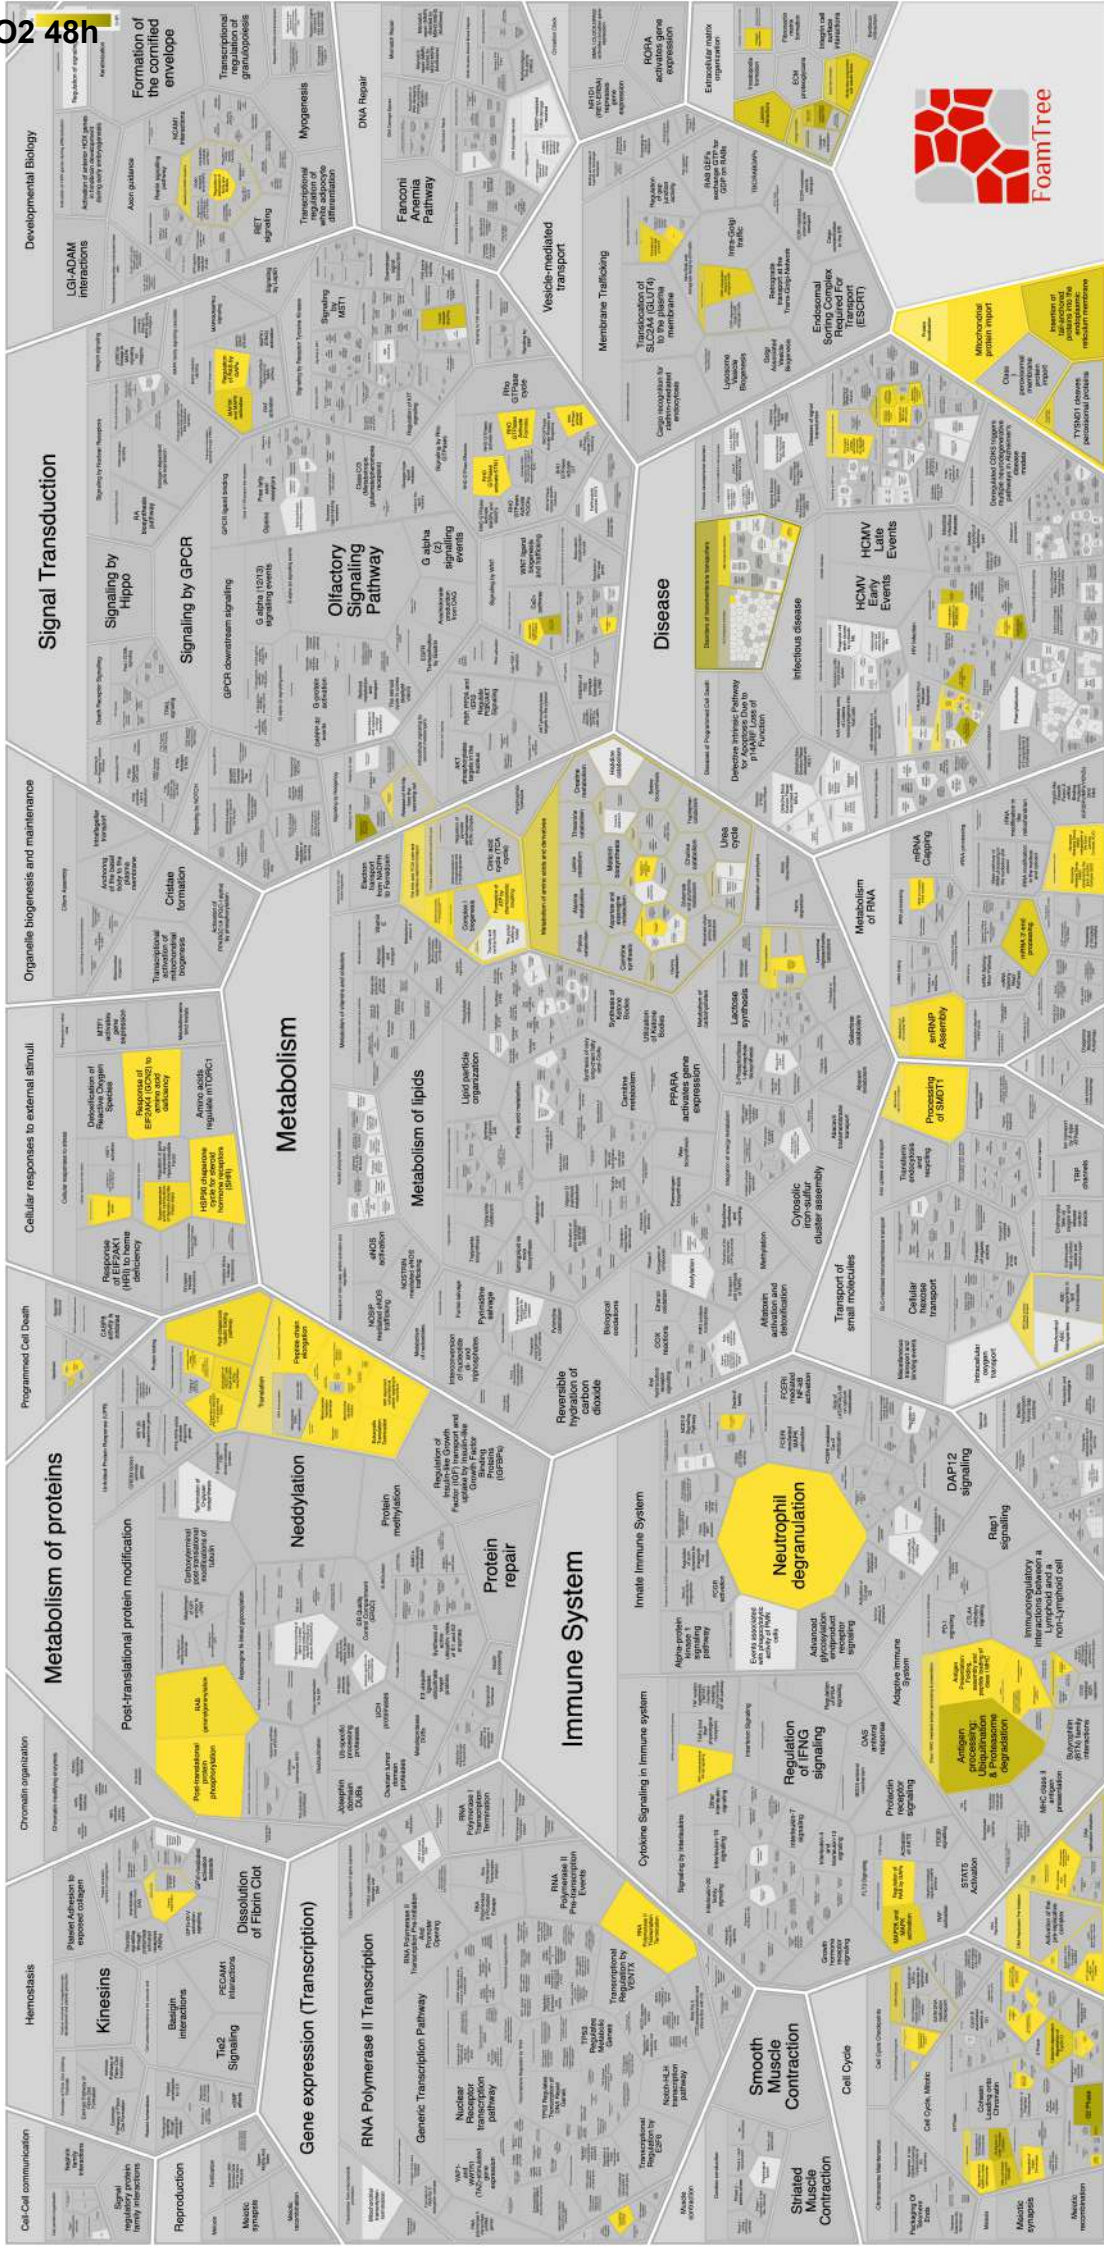



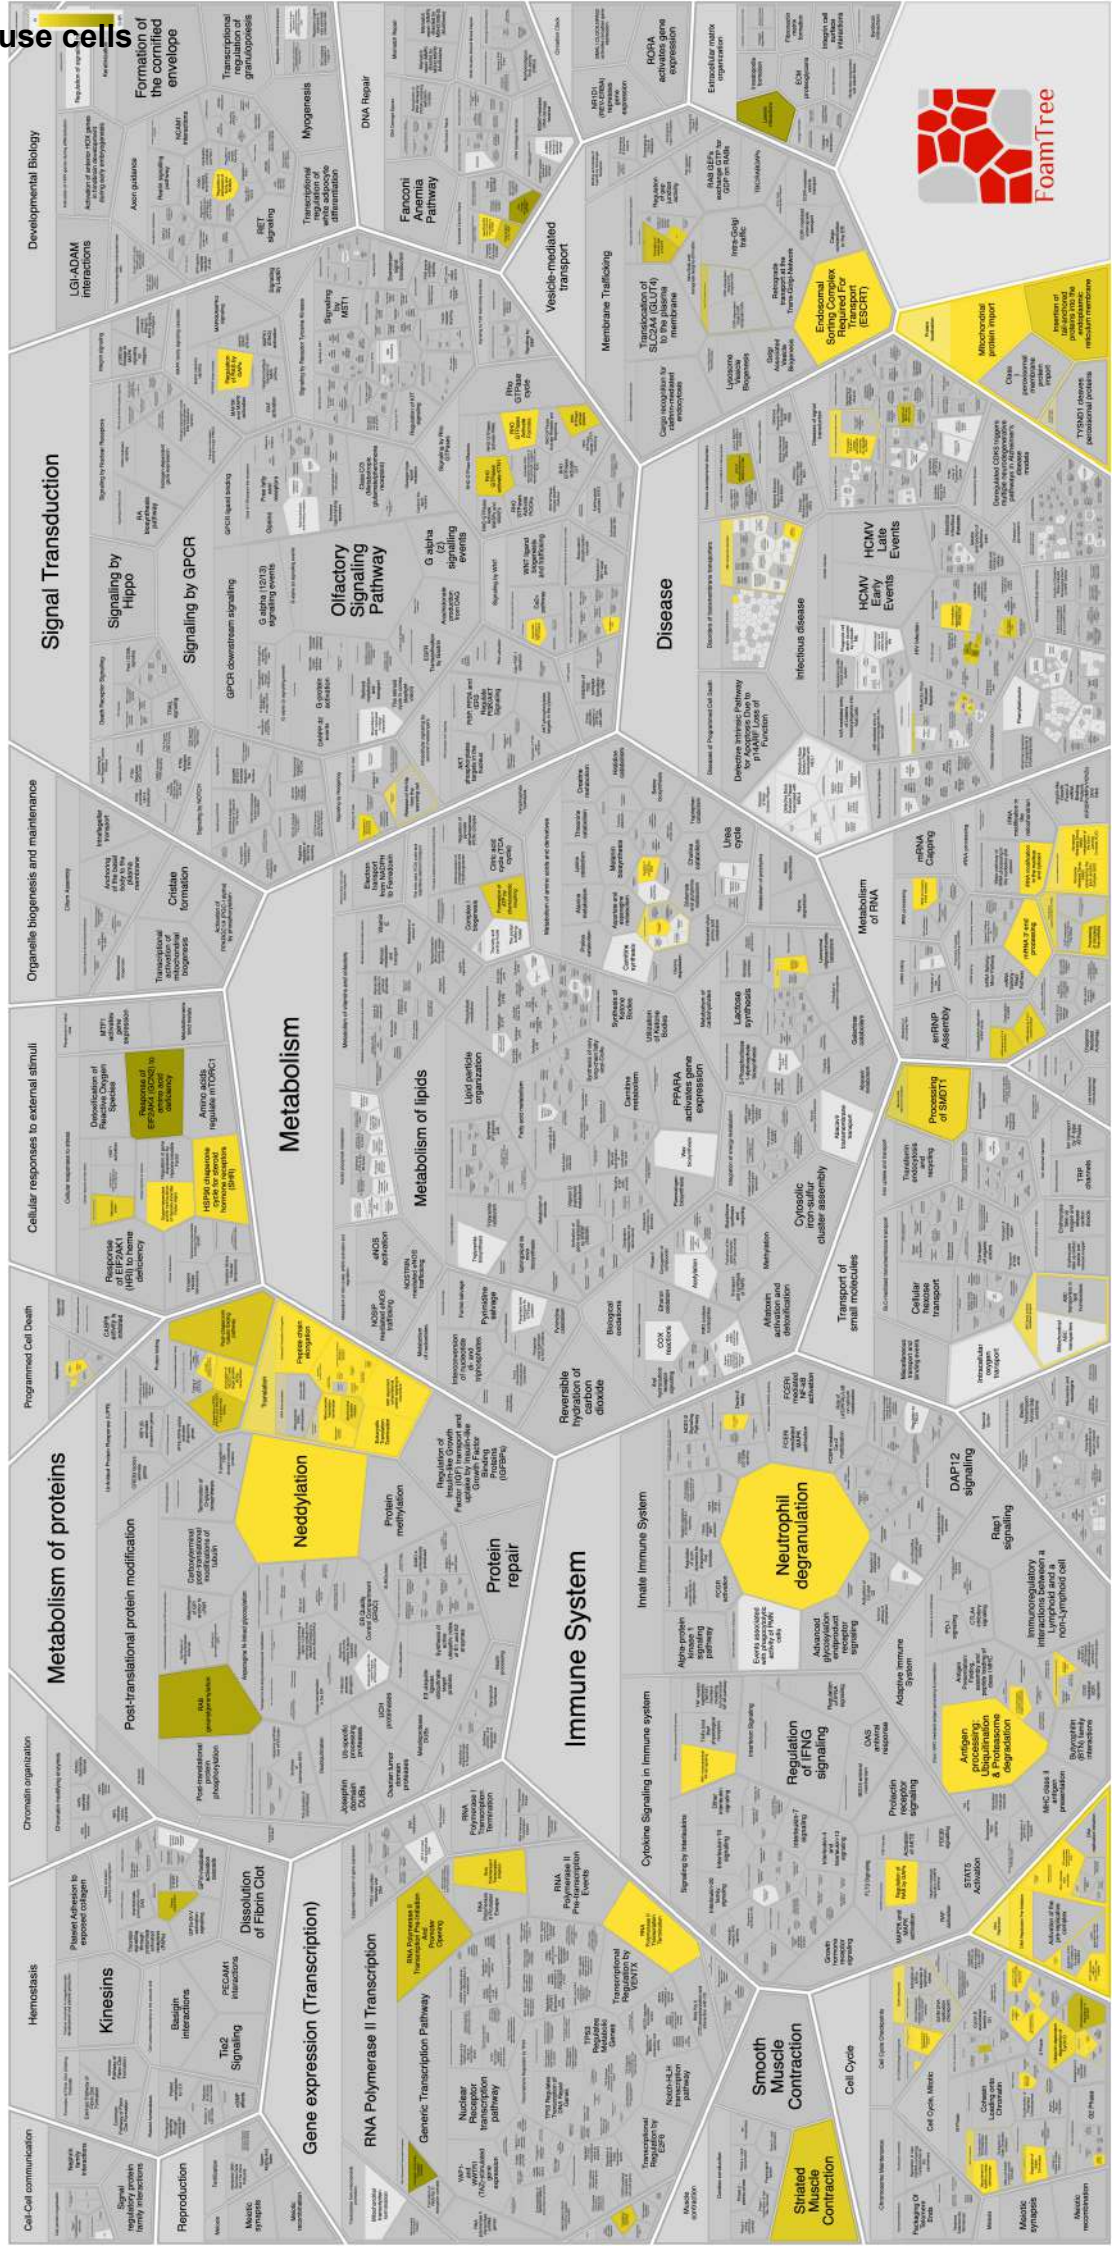



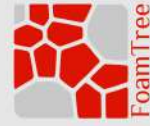



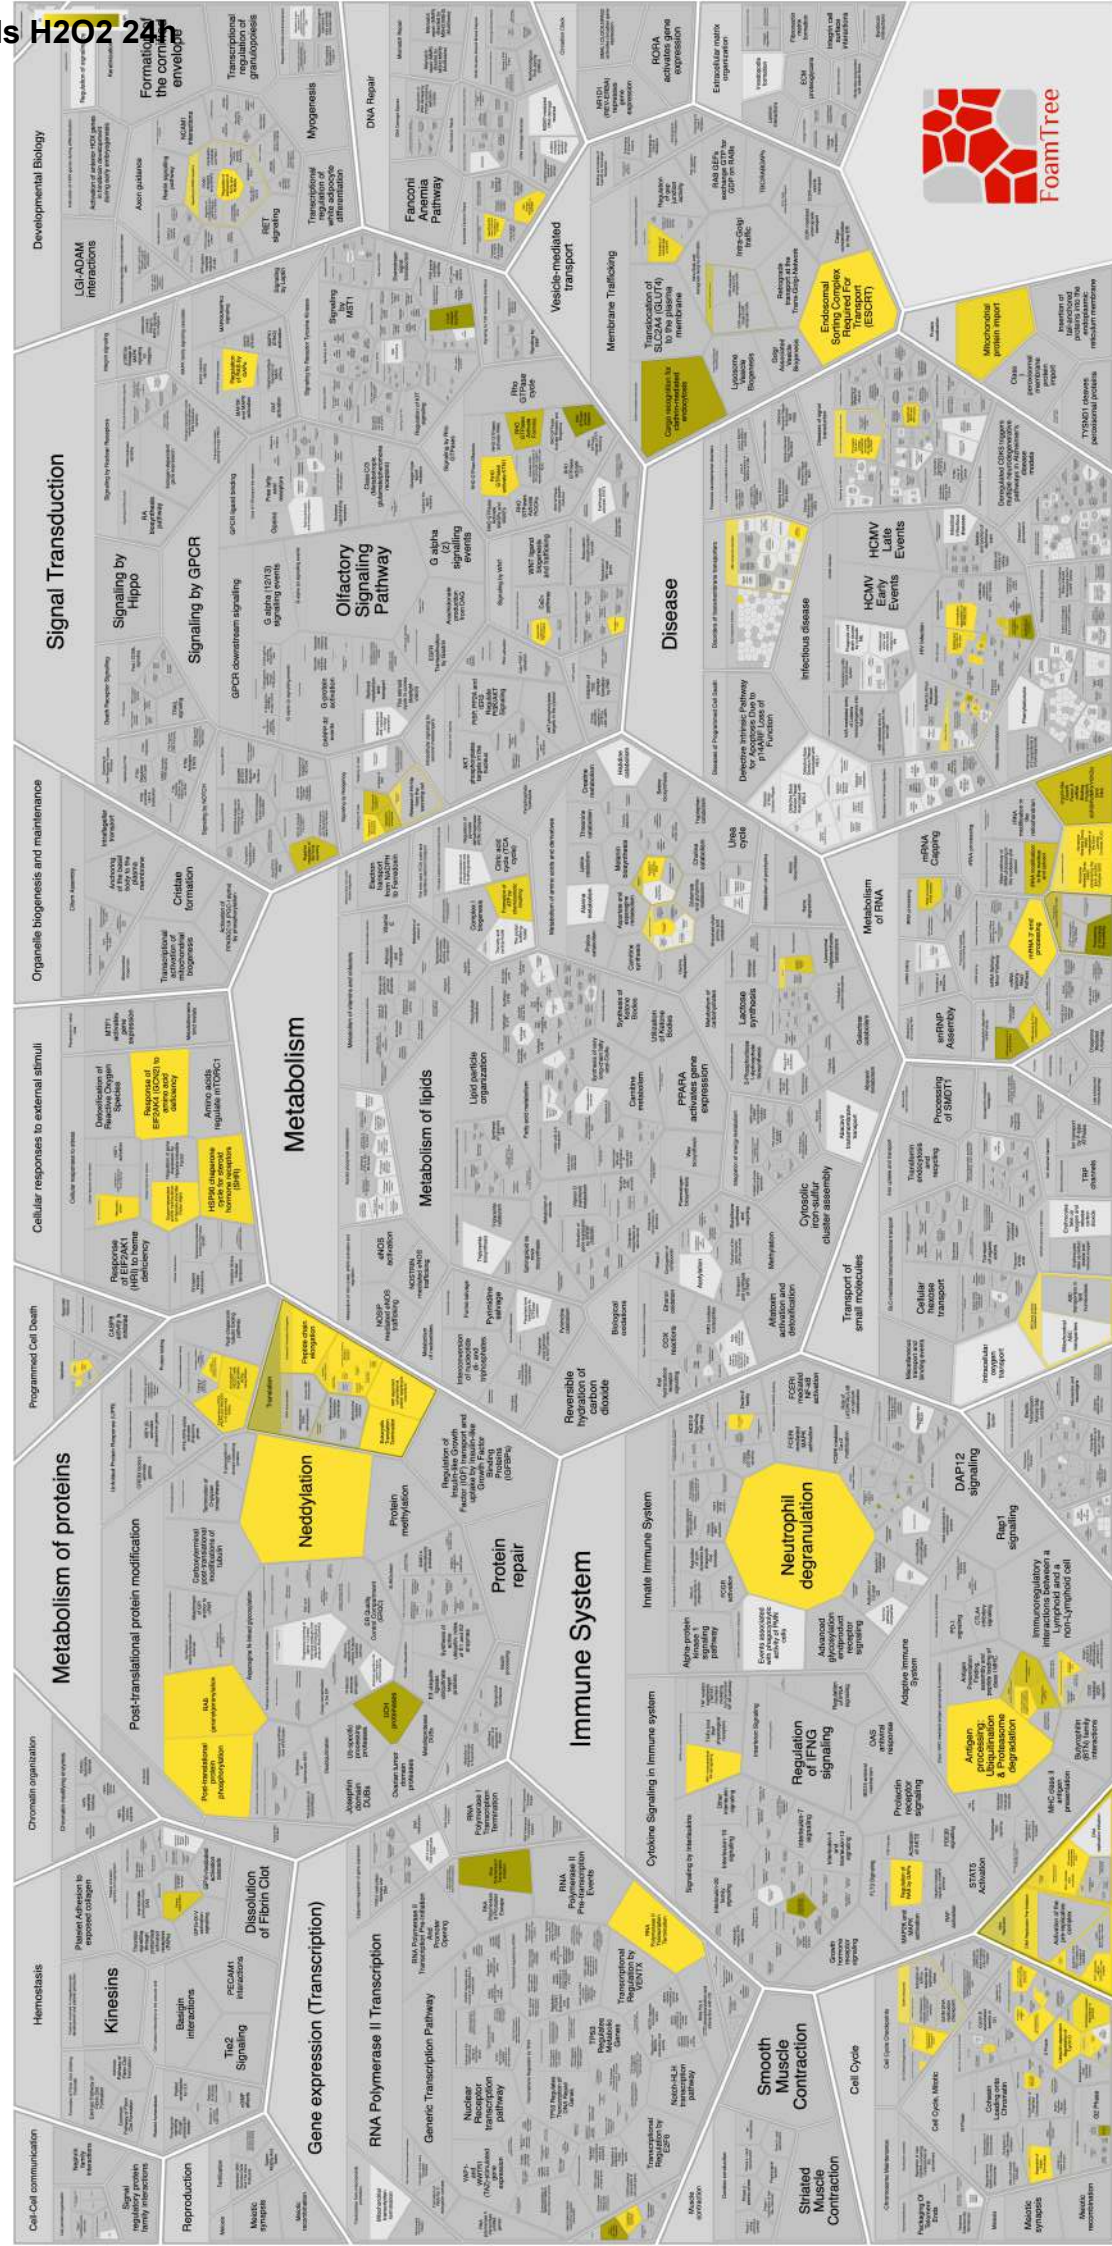



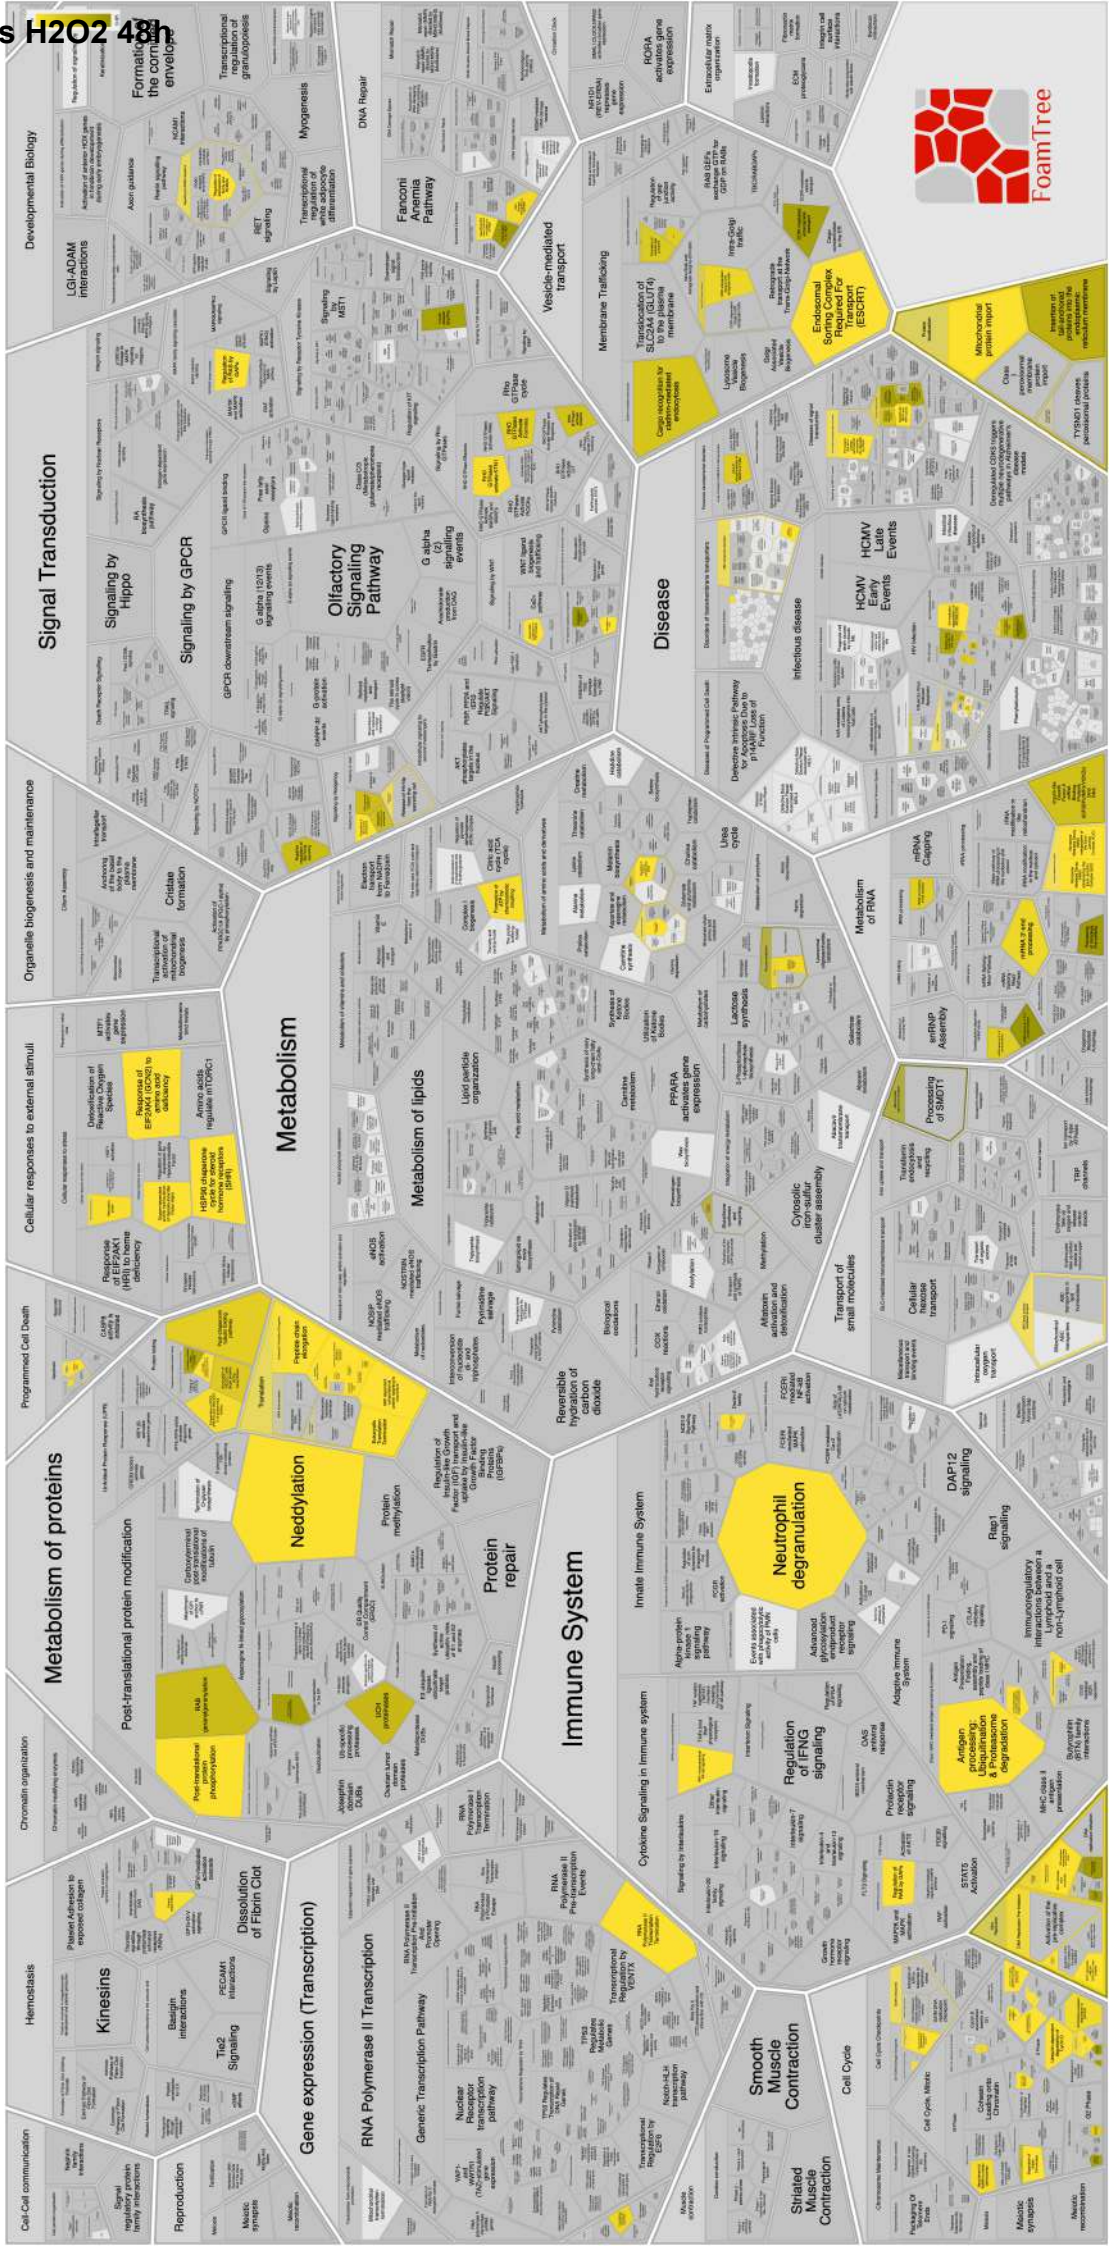

Supplement: s1 [file s1]

# BD FACSDiva 8.0.1

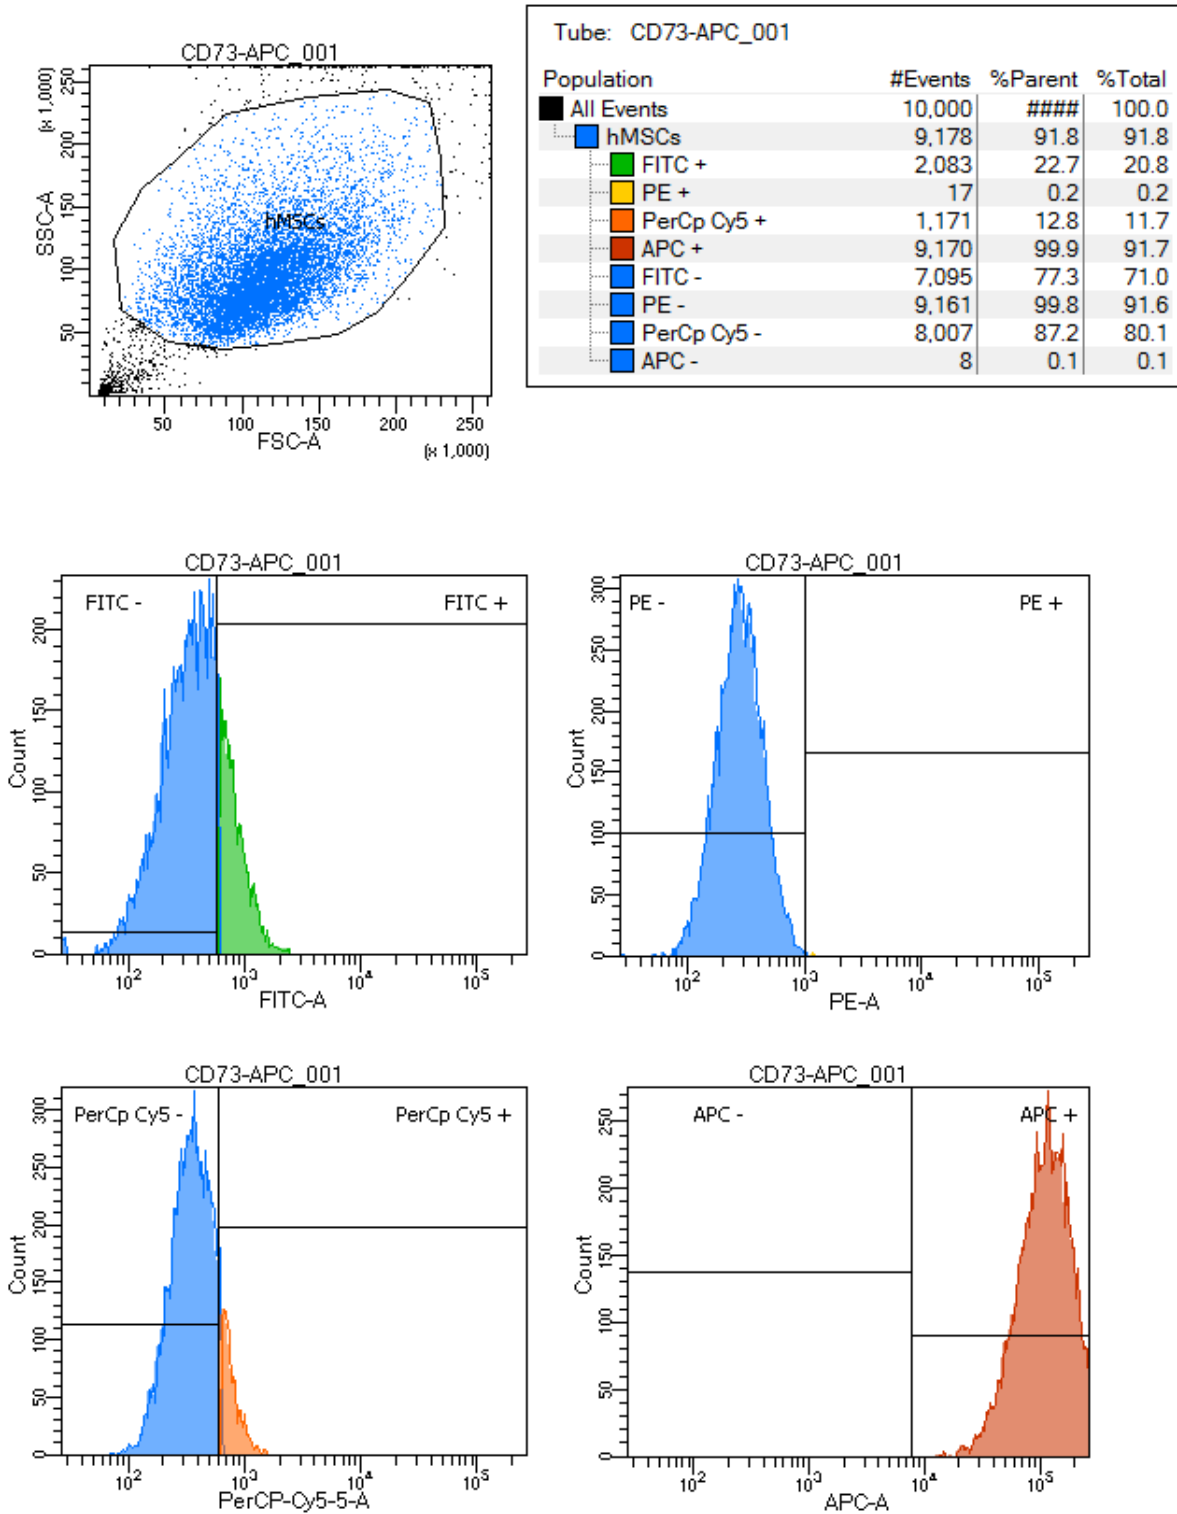

# BD FACSDiva 8.0.1

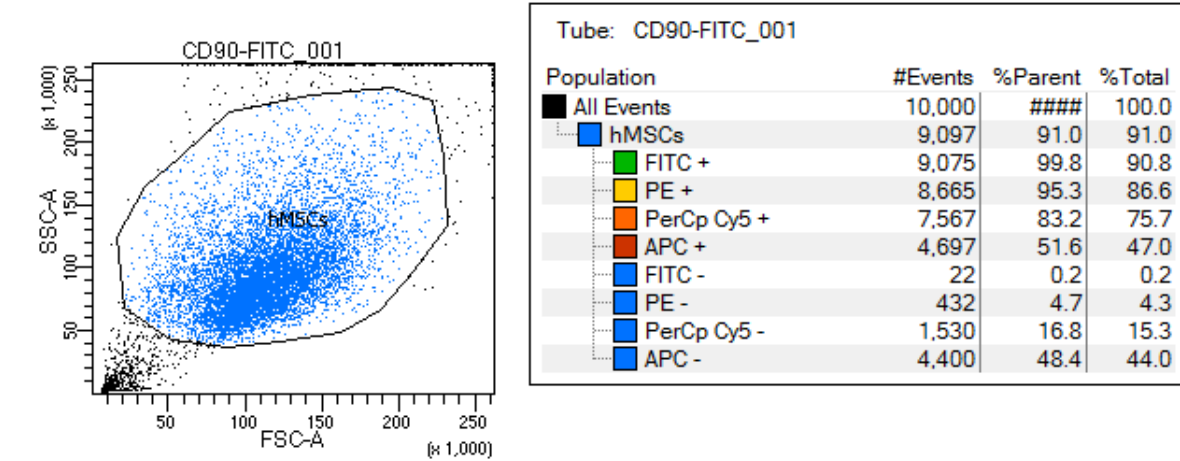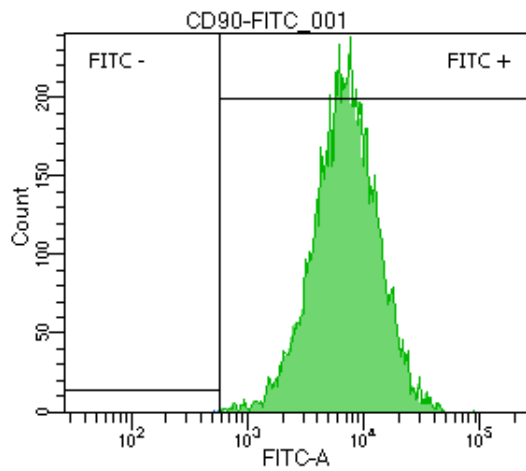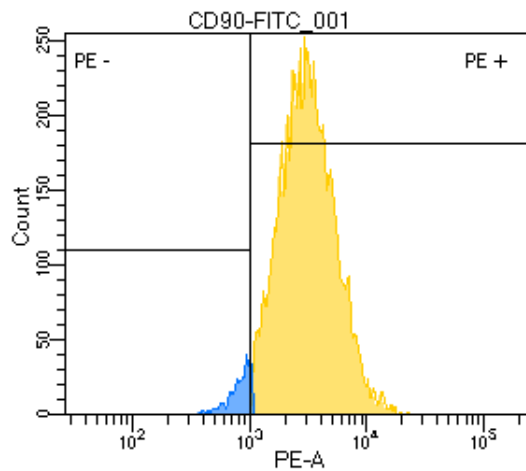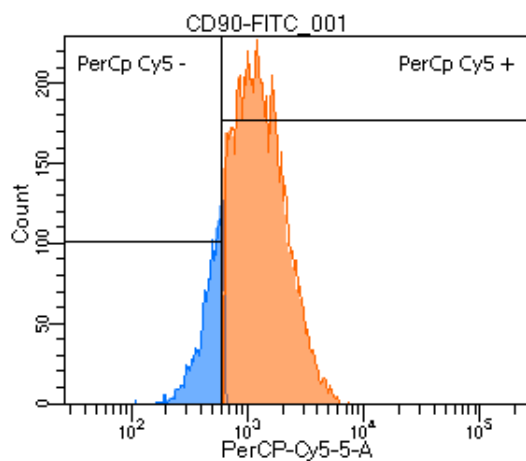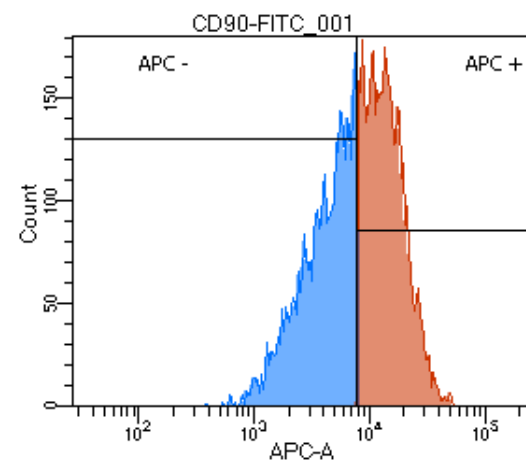

# BD FACSDiva 8.0.1

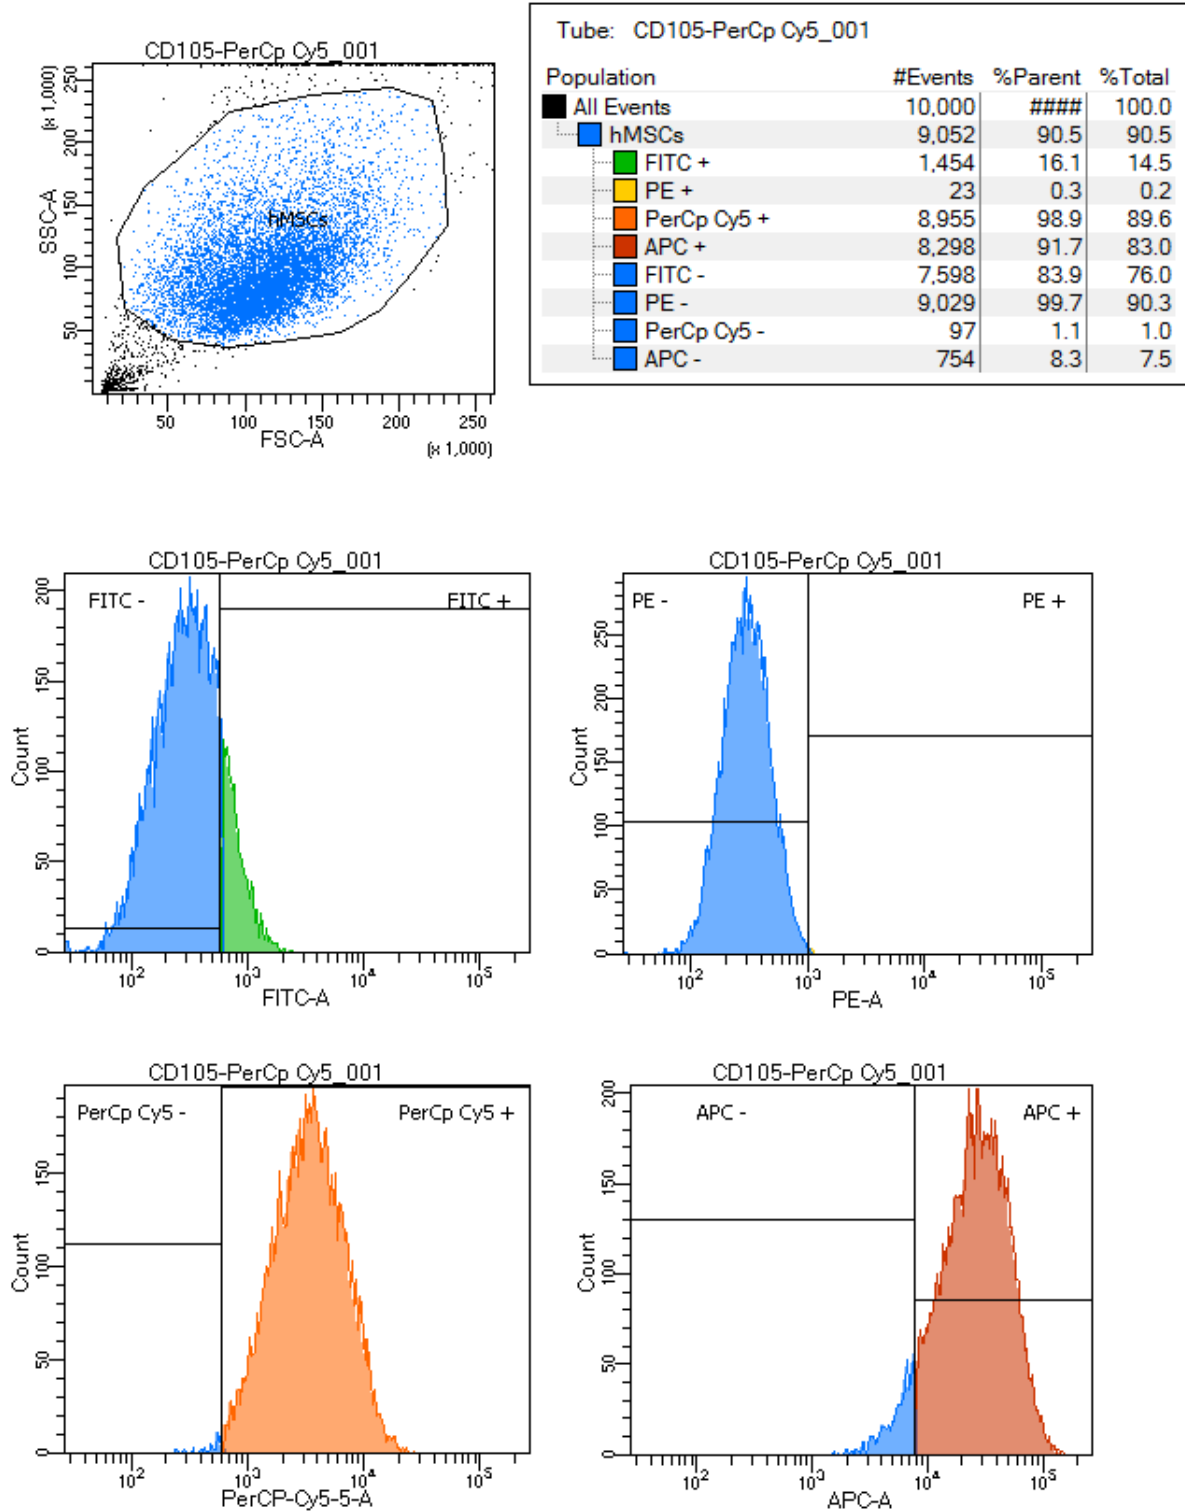

# BD FACSDiva 8.0.1

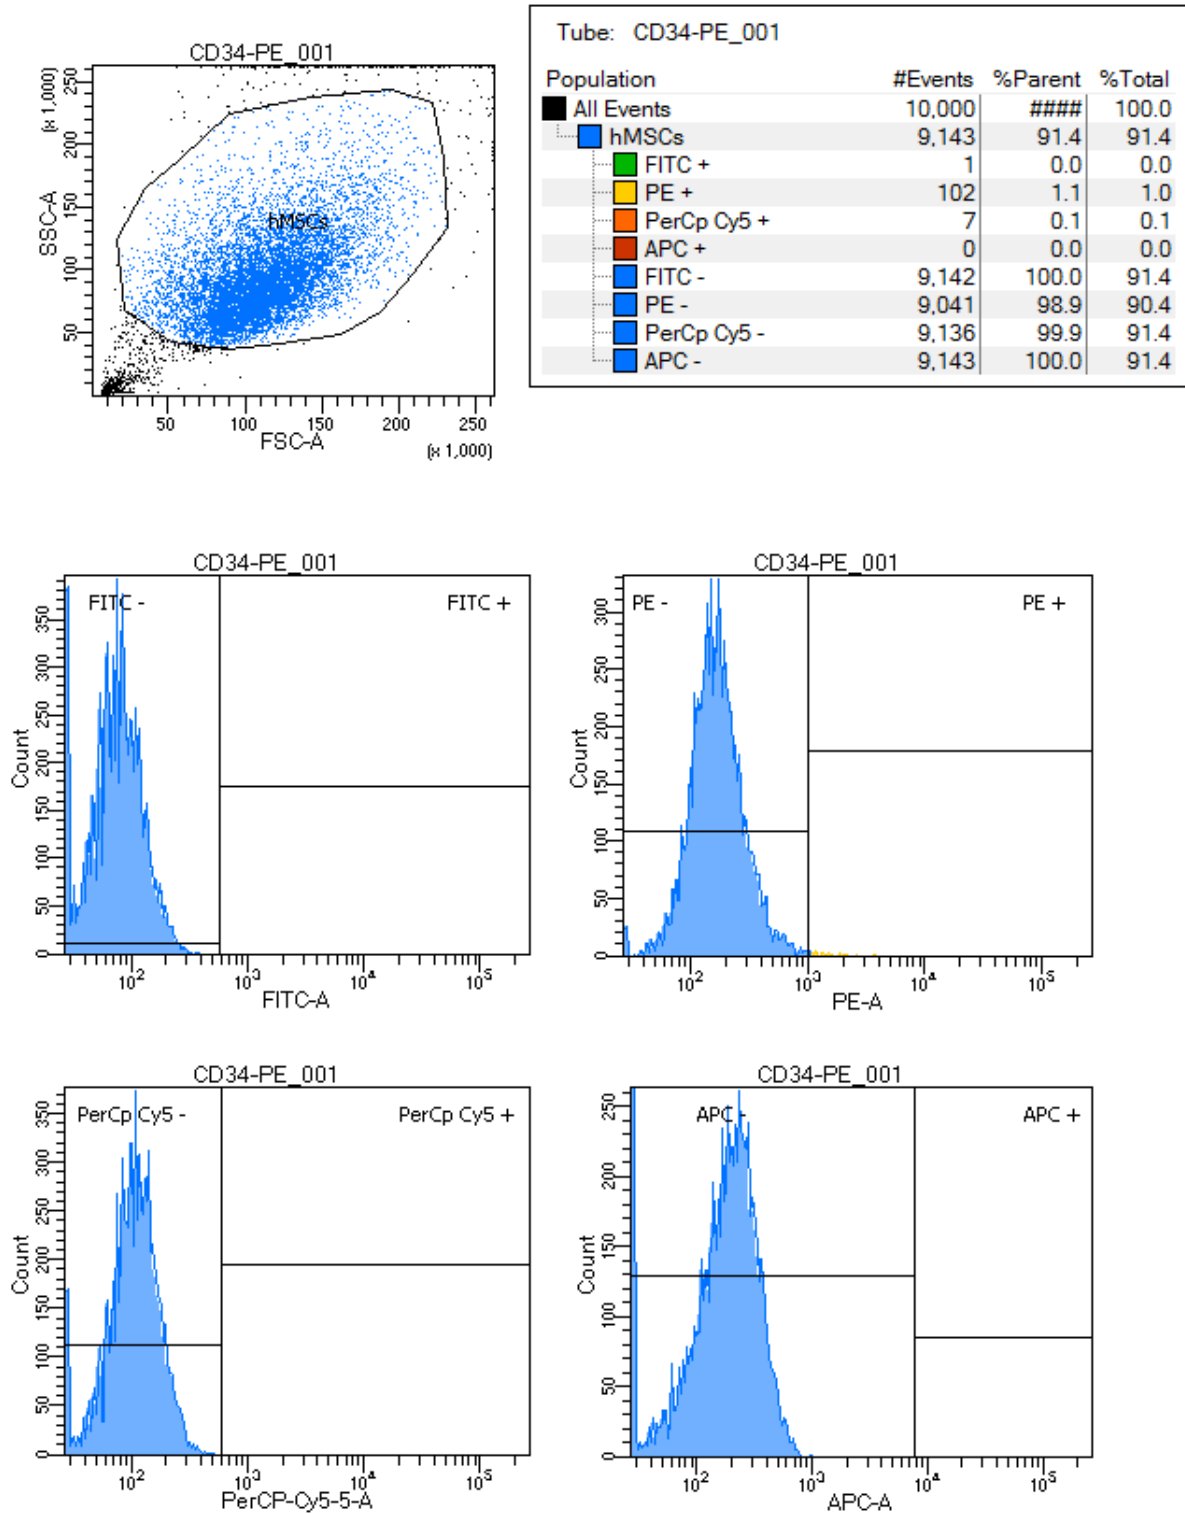

# BD FACSDiva 8.0.1

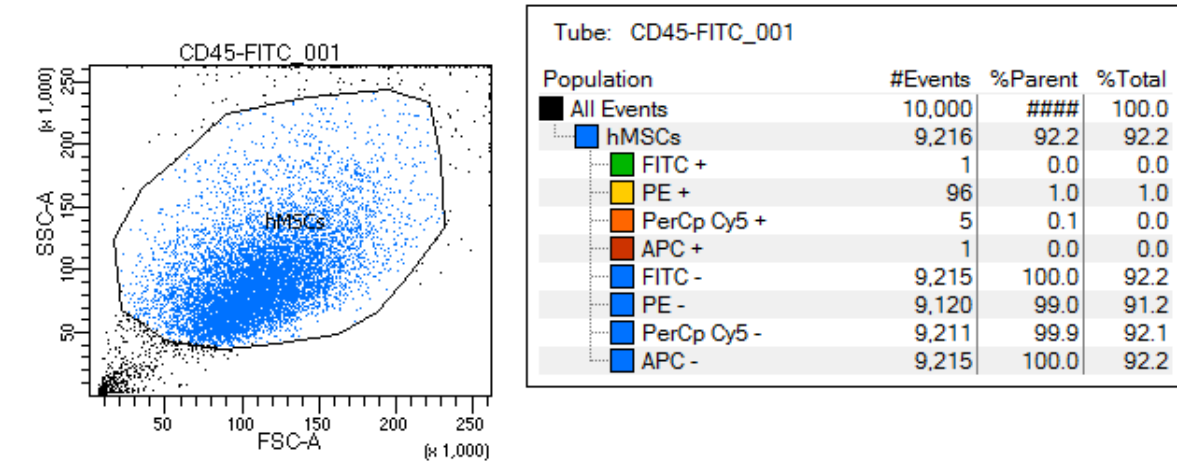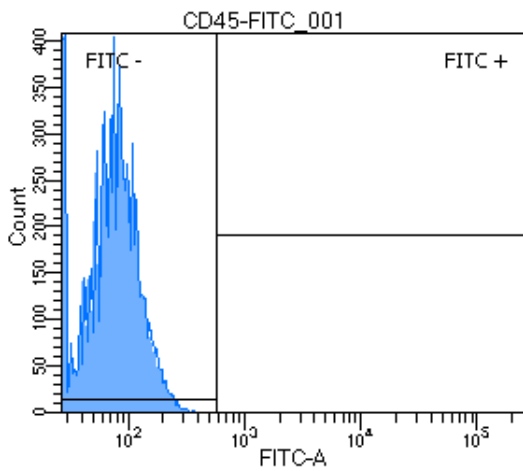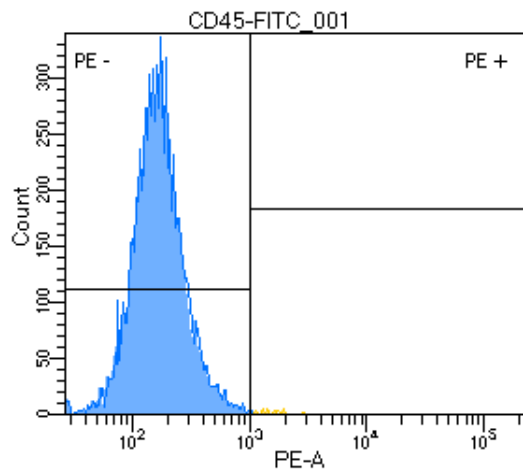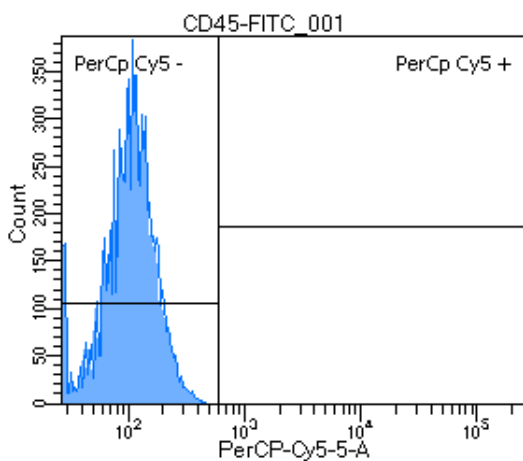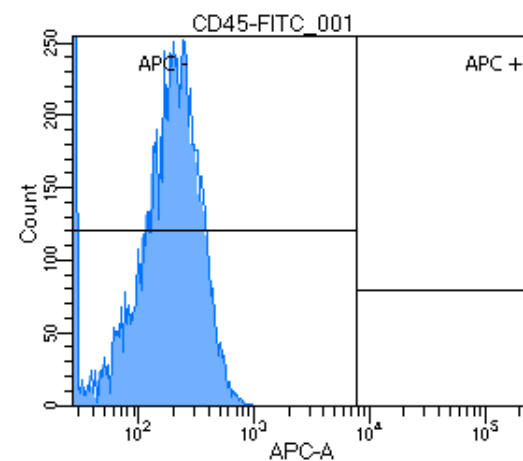

Supplement: s1 [file s1]
